## Patchwork of contrasting medication cultures across the USA

Rachel D. Melamed<sup>1,2</sup> and Andrey Rzhetsky<sup>1,2,3\*</sup>

<sup>1</sup>Institute of Genomics, Genetics, and Systems Biology, Biological Sciences Division;

<sup>2</sup>Section of Computational Biomedicine and Data-Intensive Science, Biological Sciences Division;

<sup>3</sup>Department of Human Genetics, and Computation Institute  
University of Chicago, IL 60637, US.

\*Corresponding author [arzhetsky@uchicago.edu](mailto:arzhetsky@uchicago.edu)

### Abstract

Health care in the United States is markedly heterogeneous, with large disparities in treatment choices and health spending. Drug prescription is one major component of health care—reflecting the accuracy of diagnosis, the adherence to evidence-based guidelines, susceptibility to drug marketing, and regulatory factors. Using medical claims data covering nearly half of the USA population, we have developed a framework to compare prescription rates of 600 popular drugs in 2,334 counties. Our approach uncovers geographically separated sub-Americas, where patients receive treatment for different diseases, and where physicians choose different drugs for the same disease. The geographical variation suggests influences of racial composition, state-level health care laws, and wealth. Some regions consistently prefer more expensive drugs, even when they have not been proven more efficacious than cheaper alternatives. Our study underlines the benefit of aggregating massive information on medical practice into a summarized and actionable form. We hope that our methodology and conclusions will guide policy measures for aligning prescriptions with best-practice guidelines.

### Introduction

US society is famously and proudly multicultural and inhomogeneous. It can be viewed as a collection of almost disjoint communities that read distinct books and newspapers, watch different news channels, purchase distinct food items, and, when buying the same food ingredient, cook it in different ways. Does this patchwork pattern extend to health care, specifically to prescription medications? We suggest that it does, analyzing a very large electronic health record dataset to draw contrasts between regions of the country. These contrasts delineate sub-Americas characterized by different disease collections, and, for patients with the same disease, distinct medications.

Clinical information is increasingly captured in both electronic healthcare systems and in administrative claims databases. The coming wealth of observational healthcare data world-wide has motivated efforts to aggregate this data and use it to infer factors influencing health<sup>1–4</sup>. Here, we utilize observational data from over 150 million individuals in over 2,000 counties across the United States to develop a nationwide model to predict drug prescription. By analyzing how use of each drug departs from

predicted values in each county, we obtain a measure of drug prescription comparable across all counties and drugs. We identify meaningful variation in use of drugs associated with demographic and geographic differences between counties.

## Results

### A model for drug prescription, and deviation from the model

We examine drug use in a subset of the Truven MarketScan claims data, containing millions of individuals each followed for up to 10 years (from 2003 to 2013). The present analysis focuses on prescriptions for female patients who have county codes and multiple years of drug prescribing information. Prescription records include drugs dispensed, prescription week, and age at prescription. From this data, we formulate a base model quantifying the probability that a patient will have a first-time prescription for a given drug, accounting for age, calendar year, and amount of medical attention (Figure 1a). We fit the base model separately for each drug, using data from all counties, containing a total of around 35 million patient-years.

Using the nationwide base model, we predict incident prescription for the 598 most highly prescribed drugs in 2,334 populous counties. We compare the expected number of prescriptions against the number observed for each drug in each county, quantifying the difference in a value we call the *drug-county deviance*. A high positive deviance for a given drug in a given county indicates more prescription than expected, given the nationwide data on use of that drug, and the distribution of medical records in that county. For example, if a drug were only used in one county, that county would have a high positive deviance for that drug, and every other county would have a negative deviance for the drug. The drug-county deviance represents un-modeled sources of variation between the counties.

### Drug-county deviance is consistent with known variation

To assess whether it represents meaningful signal, we compare drug-county deviance to other sources of information. We show that drug use is significantly more similar for pairs of counties located closer together (Spearman's  $\rho = 0.30$ ,  $p < 10^{-30}$ ), and pairs of counties with similar demographics (Spearman's  $\rho = 0.31$ ,  $p < 10^{-30}$ , Methods). State-level influences such as insurance networks and state legislation would be expected to impact drug use, and we also are able to detect this effect (Methods,  $p < 10^{-18}$ ). Next, we create *state* drug deviance values, which measure the disparity between observed and expected prescriptions for each drug in a state. Clustering states by the similarity of their profiles of drug use recovers known similarities between states (Fig. 1b). We also find some unexpected groupings—for example northern New England is most similar to Minnesota and Wisconsin. The correlations suggest that drug use particularly differs between northern and southern states, and between urban and rural states.

Much as similar counties have similar drug preferences, we find that drugs with related therapeutic purposes have more similar use across counties ( $p < 10^{-3}$ , Methods, Supplementary Figure 1a). For some drug classes, such as thyroid hormone replacement, drugs have extremely similar deviance across counties (Supplementary Fig. 1b).

Other classes contain drugs with differing characteristics, and we detect interesting diversity in drug use. The class of opioid analgesics includes some Drug Enforcement Agency schedule II compounds, with highest potential for abuse among legal drugs. Among these, oxycodone deviance ranges widely across regions, as has been reported<sup>5</sup> (Supplementary Figure 2). Curtis, et al., showed that variation in schedule II opioid prescription, in the mid-2000s, was related to state prescription drug monitoring programs, intended to deter abuse<sup>6</sup>. Our results are consistent with these effects (rank-sum test  $p < 0.008$ , Methods, Supplementary Fig. 2). Other contemporary studies<sup>7-9</sup> suggested that schedule II monitoring programs resulted, undesirably, in increased utilization of schedule III drugs. Consistent with these reports, we find negative correlation of schedule II drug deviances with schedule III hydrocodone and propoxyphene opioids.

We also compare disease-associated drug use to disease-associated death rates<sup>10</sup>. For example, greater use of diabetes drugs in a county is predictive of a higher death rate from diabetes (Supplementary Fig. 3a, Supplementary Table 1). Since causes of death themselves have strong correlations, it is unsurprising that use of diabetes drugs is also predictive of lower suicide rate.

Both the analyses of opioids and of death rates reveal meaningful covariation of drug deviance that is consistent with other regional differences. The analysis of state similarities (Fig. 1b) shows that areas with similar populations have similar profiles of drug use, suggesting that the United States contains multiple subcultures of drug prescription. Thus, in the next section we aim to identify chief types of variation in drug use across counties.

### **Covariation in drug use across counties**

Correlations between use of medications arise due to their complex relationships with diseases and treatment choices. For example, obesity rates vary between counties, and obesity leads to multiple secondary health problems indicating use of certain drugs. An intuitive approach to untangle the signal in this data is to find the axes of strongest covariation underlying these correlations. These represent continuous latent variables, and we would expect them to relate to factors such as obesity that explain the most variation in drug use. We perform principal component analysis (PCA) of the matrix of drug county deviances. PCA finds as its first component a projection (a linear combination) of the county drug data that captures the most variance among counties. The second component is another linear combination of the drug values that maximizes the variance, with the constraint that it is uncorrelated with the first, and so on. We project each county onto the recovered most significant components; these represent a few orthogonal rankings, or scores, of counties. We confirm that PCA results are robust by assessing the effect of removing subsets of the data (Supplementary Fig. 4).

Using these projections as proxies for independent latent variables influencing drug use, we examine the implications of the strongest four PCA components, which jointly explain 77% of the variance. We give each projection a nickname summarizing the positively and negatively correlated county characteristics. The first component (35% of variance), nicknamed *North/West-Southeast*, varies most between counties located in Southeastern states as opposed to Northern and Western states; the second component represents the *Urban-Rural* axis (20% of variance); the third, *South/West-*

*Northeast*, divides out mainly northeastern counties with high white population, high obesity, high fraction of population insured, and high health costs (12% of variance); the fourth, *White/Wealth-nonWhite/Poverty* particularly captures drug use associated with income, and fraction of non-Hispanic African American, versus non-Hispanic White population (10% of variance). Thus, the top four components reflect multiple factors that vary across counties, and that independently influence prescription.

We visualize the variation captured by each PCA axis in two ways. First, we display how the projected value of each county on this component varies with the county's geographical location, using a colored map of the country (Fig. 2a, 3a, Supplementary Fig. 6,7). Second, we compare the projection to demographic information on each county (described in Methods, Supplementary Fig. 5). Figure 2a,b,c show the association of *Urban-Rural* with population density. We also compare *Urban-Rural* projection against the county's averaged deviance value for drugs in various therapeutic classes. Figure 2d shows that as *Urbanity* grows, counties have fewer prescriptions for potassium repletion supplements, corresponding to lower use of potassium-depleting diuretics prescribed for hypertension. *Urban* counties use more dermatologic agents, such therapeutic class *Anti-inflammatory Skin/Mucous Membrane (Antiinf S/MM)*, as well as fertility medications.

Another latent variable, *North/West-Southeast*, reflects a pattern of covariation among counties that appears geographically distinct from that of *Urban-Rural* (Fig. 3a). In order to summarize this component, we compare positively and negatively correlated demographic characteristics and drug therapeutic classes, arranged by correlation with *North/West-Southeast* (Fig. 3b,c). Counties in the *Southeast* extreme have bad health and higher non-Hispanic African-American populations, as compared to *North/West* counties. All seven drugs belonging to the therapeutic class of antipsychotics are prescribed more in *North/West* counties (mean  $\rho = 0.46$ , Fig. 3d). Antipsychotic prescription is correlated with county life expectancy ( $\rho = 0.31$ ) and excessive drinking ( $\rho = 0.34$ ), among other demographic characteristics that are also associated with *North/West* counties. It is unsurprising that more wealthy and healthy counties could have increased diagnosis and thus treatment of psychotic disorders, as compared to poorer parts of the country with other health problems. In contrast, allergy and cold medicines (Fig. 3e) are highly used in most *Southeast* counties. This is consistent with a pattern of less prescription of preventive care drugs. People in these counties likely have a greater proportion visits for acute problems. *Southeast* counties are also distinguished by demographic characteristics including obesity and diabetes, explaining their greater use of drugs for obesity-related illnesses including hyperlipidemia, hypertension, and diabetes.

Figures 3b,c show that only one of the demographic characteristics most positively correlated with *North/West-Southeast* is connected to a negatively correlated drug class (and zero, vice-versa). This indicates that the differences between counties in terms of drug use are consistent with demographic differences. This is notable because no demographic data was used in the PCA. The consistency between drug-county deviance and demographic indicators is supported by a canonical correlation analysis, which finds a number of significant canonical correlates between the drug-county deviance matrix and the county demographics matrix (Supplementary Table 2).

Like the first two components, the next two also have a strong geographical association. For *South/West-Northeast* (mapped in Supplementary Fig. 6a), the fraction of population insured is higher in the *Northeast* than *South/West*. Some preventive care therapeutic drug classes are prescribed more in the *Northeast*, and these are generally prescribed more in counties with higher insurance rates. This includes fertility medications, fluoride treatments, and smoking cessation drugs such as *varenicline* (Supplementary Fig. 6b,c). This axis of variation captures some state-level covariation in drug use. In Supplementary Figures 6a and d, counties in Massachusetts, Vermont, and Minnesota have a higher projected value for *South/West-Northeast*, compared to counties across the state line in neighboring states. Notably, only these three states had current laws mandating public disclosure of payments from pharmaceutical companies to prescribers, which could have some shared influence on prescribing patterns<sup>11–13</sup>.

For the fourth dimension, *White/Wealth-nonWhite/Poverty*, the map of projections reveals that counties on the *nonWhite/Poverty* extreme are particularly located in the poor rural South, in a strip from the Carolinas west through Mississippi (Supplementary Fig. 7). At the *White/Wealth* end, counties are located in the middle of United States, and they spend more on health care. Consistent with high rates of obesity and diabetes in *nonWhite/Poverty* counties, they have particularly high prescription of antidiabetic and antihypertensive drugs. Another characteristic is a lower rate of prescription for the three thyroid hormones. Deviance values for thyroid hormones and diabetes drugs are negatively correlated (Spearman's  $\rho = -0.19$ ,  $p = 6.3 \times 10^{-21}$ ). Hypothyroidism can also co-occur with, and exacerbate, obesity and diabetes<sup>14–17</sup>, making under-diagnosis of hypothyroidism a possible concern.

To illustrate the geographical associations, we assign each county to at most one of the top four components, if that county has an extremely high or low projected value on that component (Fig. 4). This visualization is somewhat cartoonish, as counties often have extreme projections on more than one component—for example, Marin County, California scores high on *North/West*, *Urban*, and *South/West*. Bronx County, New York, projects as *Urban*, *Northeast*, and *nonWhite/Poverty*.

### Geographical variation in use of expensive branded drugs

Because there are wide regional differences in drug spending in the United States<sup>18</sup>, we investigate variation in drug use associated with generic versus brand-only availability. In Figure 5a we show variation in use of anti-infective and anti-inflammatory eye drops. From left to right, the drugs are more positively correlated with *Urban-Rural*, and are more expensive: the correlation between *Urban-Rural* association and brand-only availability is 0.89. The most expensive anti-inflammatory eye drop is around double the price of the second-most expensive. We contrast the most urban against the most rural counties (selected counties shown in Fig. 5c), to visualize their use of generic versus branded drugs in different therapeutic classes (Fig. 5d).

Of course, other factors besides price drive drug selection. But, across drug classes ranging from antihypertensives to skin care, *Urban* counties prescribe more brand-only drugs (Fig. 5b,c, Spearman's  $\rho = 0.48$ ,  $p = 8.7 \times 10^{-37}$ , Methods). We summarize correlations between price preference and each of the top four variables, for the largest drug therapeutic classes. Figure 5b shows that *Urban-Rural*, *North/West-Southeast*, and *White/Wealth-nonWhite/Poverty* have consistent price preferences,



though the trend is apparent in different drug classes for each axis. *Northeast* counties also somewhat prefer brand drugs, but less consistently across all drug classes.

Like *Urban* counties, *Southeast* counties prefer expensive drugs (Spearman's  $\rho = -0.095$ ,  $p = 0.019$ ), even accounting for drug class (Fig. 5b). In addition to their overall lower use of antidepressants and antipsychotics, *Southeast* counties particularly prescribe less of cheaper psychiatric drugs (Fig. 5e). The preference for more expensive drugs is surprising, as *Southeastern* counties are generally poorer than the national average. But of these, the poorest counties have a low projection on *White/Wealth-nonWhite/Poverty*. Opposed to the general trend for *Southeast* counties, *nonWhite/Poverty* projection is correlated with preference for generic drugs (Spearman's  $\rho = -0.23$ ,  $p = 1.4 \times 10^{-8}$ ).

### Variation in price preferences may not follow evidence of effectiveness

*Prilosec* was a blockbuster drug for heartburn that went off-patent in 2001. That year, *Prilosec*'s maker introduced *Nexium*, a much more expensive brand-only drug. *Nexium* has a different form of the same active ingredient, and any superiority to *Prilosec* remains controversial<sup>19</sup>. As would be expected of competing drugs for the same condition, use of *Prilosec*, and its generics, is negatively correlated with use of *Nexium* across counties (Spearman's  $\rho = -0.22$ ,  $p = 9.9 \times 10^{-28}$ ). In Figure 5f, we contrast use of these two drugs across counties ranked by the three components most correlated with price.

As another example, we examine variation in prescriptions for hypertension drugs, which comprise 10% of the drugs in our analysis. These represent a wide range of treatment choices. Near the beginning of our study period, revised guidelines recommended cheaper older drugs, thiazide diuretics, as more beneficial than expensive new hypertension treatments<sup>20-22</sup>. However, later studies showed that physicians resisted re-adoption of older thiazide diuretics, possibly due to marketing of newer drugs<sup>23</sup>. One estimate<sup>24</sup> suggests this resulted in \$1.2 billion per year of unsupported excess prescription spending. We find that cheaper drugs within classes, and cheaper classes of antihypertensive agents, are prescribed more in regions preferring generic drugs (Supplementary Fig. 8). Notably, *Urban* counties use more angiotensin II receptor blockers, the most expensive antihypertensive class. In contrast, *nonWhite/Poverty* counties have high hypertension drug use across many classes, but they particularly use cheaper drugs, such as non-combination thiazide diuretics.

### Modeling regional price preferences

As a different approach to examining brand preferences in each county, we model drug deviance as a function of drug generic status and therapeutic class. This model estimates preference for generic or brand drugs in each county (Figure 6A), and state (Fig. 6b). The result is consistent with our previous findings: urban areas, particularly the corridor from New York to Washington, DC prefer more expensive drugs, as do parts of the southeast. Northern New England, some Midwestern and western states prefer cheaper drugs. Using the demographic information on each county to predict preference for expensive drugs, we find income, health care costs, and access to exercise opportunities are most predictive of expensive drug preference (Fig. 6C). However, this model only explains a quarter of the observed variance in brand

preference across counties ( $R^2 = 0.24$ ). Other factors, such as state level laws, insurance networks, or cultural preferences, must explain the rest. The latent variables uncovered via PCA point to possible influences.

## Discussion

Disparities in health outcomes across US regions are well known<sup>25–29</sup>. Complementing that work, we have developed and supported a systematic approach to compare use of all popular prescription medications across most counties. As well as allowing inspection of variation in use of each drug, our approach enables emergent detection of large scale trends. Particularly intriguing is evidence that some regions appear to prefer more expensive branded drugs. Health costs in the United States account for more than 17% of the nation’s economy, and drugs are the fastest-growing category of healthcare spending.<sup>30</sup> Open questions include whether preference for generics reflects more efficient, but equally effective, use of healthcare dollars, and if pharmaceutical marketing is swaying treatment choices.

Our data does not uniformly sample across different areas of the country, and it does not uniformly represent sociodemographic strata within each county. We pose our question therefore in the following way: given private insurance, how does drug use vary? This yields a generalizable model applicable to other healthcare data.

The canonical correlation analysis indicates a number of significant “canonical variables” beyond those we explored here (visualized at <http://54.211.36.187/app>, domain name pending), inviting future work. Another way to build on our framework would incorporate diagnosis data to compare treatments in patients with a given medical condition across the country. We could also use drug-county deviances in slices of time to examine how medical practices spread through regions. As data grows, temporal changes in diagnosis and drug use will become increasingly informative.

## Methods

### Predicting rate of drug use from claims data

As mentioned, the Truven Health Analytics MarketScan data (recently acquired by IBM Watson) contains patient identifiers linked to time-stamped National Drug Codes (NDC) as well as information about patient age and zip code. We match NDC codes to drug generic names using the MarketScan RED BOOK™ Supplement (includes variables related to drug prescription). For each drug generic name, we separately model the probability of an incident prescription over the course of a person-year. Our sample unit is the person-year, where we assume that each observed person-year has a homogeneous probability of drug use that depends on four factors: age (divided into 5 year bins), calendar year, the number of prescriptions for that person in that year, and the number of years observed. Referring to one setting of these four variables as a **bin**  $\mathbf{b} = \{age = a, year = y, number\ of\ medications = r, number\ of\ years = n\}$ , we obtain all person-years falling into a given bin. Using an approach related to survival analysis, we can then model the probability of use of drug  $d$  for a given bin  $b$  with the following assumption:

$$p(\text{take drug } d \text{ during bin } b) = \frac{y_{d,b}: \text{individuals observed taking } d \text{ in } b}{n_{d,b}: \text{individuals observed in } b}.$$

A person is observed in bin  $b$  for drug  $d$  (and thus counts toward the denominator  $n_{d,b}$ ) if the following two conditions are met: 1) the person is observed in the year  $y$ , of age  $a$ , etc, and has  $r > 0$  new prescriptions during that year; and 2) that person has never been observed taking drug  $d$  before. We require that a person must have more than two years of data, where the first two years are used only for comparison to ensure that we are measuring incident drug use. Since each bin is one combinatorial setting of these variables, there are over 30,000 observed bins. Some bins involving patients with many prescriptions per year can be very sparsely observed; thus, we collapse bins for highly observed patients.

Next, we assume that the probability of prescription follows a binomial distribution, where the binomial probabilities are used as response variable in a logistic regression model. In this model, we include the four bin variables as categorical (dummy) covariates, and we allow all pairwise interactions between the variables. We use the *sklearn* toolkit to fit the model, with a regularization parameter tuned for best fit to a random test sample. We call this model the *USA model*. In order to assess the bias of this model, we create random samples of patient data as follows: we select at random a patient, and then for that patient, we select a random year from among the observed years. Thus, we create a sample of person-years, and we compare predicted drug use in our sample against the actual number of each drug prescribed as follows. For each drug, we obtain the observed number of incident prescriptions  $y_d$ . The expected number of prescriptions under the model is then the sum of the probability for each person-year  $i$ :  $\hat{y}_d = \sum_i \hat{p}_{i,d}$ . The person-year probability  $\hat{p}_{i,d}$  is the predicted probability from the logistic regression model for that drug, given the bin settings for that  $i$ th person-year (age, calendar year, number of prescriptions, number of years). Comparing these observed and expected values for different drugs, for different samples, we conclude that while our model does not account for all sources of variance, it is unbiased for prediction of person-year drug use (Supplementary Fig. 10 shows some examples).

### Calculation of drug deviance value per county

Next, we compare the model to the person-year data from each county to determine if each county has more or less drug prescribed than would be expected in the USA model. Let  $n_{d,b,c}$  be the number of people observed in county  $c$ , who could have taken drug  $d$  in bin  $b$ . Of these people, we observe  $y_{d,b,c}$  who actually took that drug. The model already accounts for variation in age and amount of medical care, but in order to ensure that different population distributions in different counties do not influence the results, we also standardize all populations to the nation-wide population. We calculate a weight value for each bin, representing the fraction of the national population that falls in that bin:  $w_{d,b} = \frac{n_{d,b}}{\sum_b n_{d,b}}$ . Then, for each drug, and for each county, we obtain the following weighted values for the observed number of people total, and taking the drug, respectively:  $n_{d,c} = \sum_b w_{d,b} \cdot n_{d,b,c}$  and  $y_{d,c} = \sum_b w_{d,b} \cdot y_{d,b,c}$ . The corresponding population-standardized expected value of drugs taken under the USA model is  $\hat{y}_{d,c} = \sum_b w_{d,b} \cdot n_{d,c,b} \cdot \hat{p}_{d,b}$ .



Now, we compare the observed and expected county values:  $\hat{y}_{d,c}$  and  $y_{d,c}$ . While the ratio of these values provides a decent estimate of the relative use of the drugs, the ratio is very sensitive to sampling variability for less common drugs. Therefore, we instead use a measure based off of the deviance residual from the binomial<sup>31</sup>. This measure quantifies how well the USA model fits the county data by evaluating the likelihood of the county data under the USA model. Then, drug-county deviance for drug  $d$  in county  $c$  is:  $G_{d,c} = \text{sign}(y_{d,c} - \hat{y}_{d,c}) \cdot \left[ y_{d,c} \cdot \log \frac{y_{d,c}}{\hat{y}_{d,c}} + (n_{d,c} - y_{d,c}) \cdot \log \frac{n_{d,c} - y_{d,c}}{n_{d,c} - \hat{y}_{d,c}} \right]^{.5}$ . Compared to the log-ratio, the deviance residual has much less extreme values for less common drugs (Supplementary Fig. 11).

### Aggregating other county characteristics

In order to compare drug deviance values to other measures that vary across counties, we compile data on health characteristics of counties from the Institute on Health Metrics and Evaluation<sup>25,27</sup>, as well as comprehensive measures of other demographic variables and health factors from the County Health Rankings report<sup>32</sup>. These demographic county-level indicators include racial composition, medical care availability, income, health status, and behavioral measures. To this, we add population and density data, longitude, and latitude from the US Census<sup>33,34</sup>. We also gather death rate data from the CDC<sup>10</sup>. We download both the age-adjusted total death rate per county and the age-adjusted death rate per county attributed to each of the top causes of death, and divide these to obtain each county's fraction of deaths due to a cause. We remove a number of characteristics with many missing values, but we keep the 69 demographic variables with fewer than ten missing values across the 2334 most populous counties. For these, we impute the demographic value by a regression using other counties as observations, and all other demographic variables as predictors.

### Drug characteristics

In addition to mapping NDC to generic name, Red Book also contains other information for each drug. This includes therapeutic class, an indicator of whether this is an over the counter product versus prescription-only, if the primary use is acute or chronic, the DEA classification, and indicator of whether NDC corresponds to a generic or a brand medication. We collapse each generic name drug into a summary of these characteristics. We also obtain from Medicaid the National Average Drug Acquisition Cost (NADAC)<sup>35</sup>. Finally, we download drug information from the Food and Drug Administration<sup>36</sup>, with each drug's release date and pharmacological class. Generic status, release date, and NADAC are, as expected, very correlated with each other.

### Comparison of drug-county deviance with known variation between counties

As a first point of "positive control" we compare counties to each other in terms of our estimate of their drug use. We define a *drug deviance vector* for each county, containing a profile of the positive or negative deviance from the expected value of each drug for that county. We calculate the distance between each pair of counties in terms of standardized drug deviances. To show that this distance reflects known differences between counties, we compare pairwise distances to the other county covariates. First, we compare the pairwise drug distances to the geographical distance between the

county pairs, calculated using the Euclidean distance between their latitude and longitude. We also compare the drug distance scores to distance between their normalized vectors of demographic information, described above. We assess whether the drug distance is correlated to these independent measures of distance between counties using Spearman correlation.

To assess whether we capture the effect of state-level factors, we examine pairs of neighboring counties, where at least one of the counties falls on a state border. First we identify neighboring counties, using USA county shape data (<http://bokeh.pydata.org/en/latest/modules/bokeh/sampledata.html>), which contains the counties as polygons. We identify bordering county pairs as those for which the line segments intersect. We match counties to their state, and to Census and demographic information, using county Federal Information Processing Standards (FIPS) codes.

We model the pairwise distance between the two drug deviance vectors as a linear function of the county pair's demographic distance and a binary indicator of whether the pair of counties fall in the same state. This data fit well to a model with statistically significant coefficients for both variables, in the expected directions. That is, a pair of bordering counties with less similar demographics (greater distance between their demographics vectors) have greater distance between their drug deviance vectors (demographic distance coefficient = 0.16, standard error = -.06,  $p = 0.01$ ). If the two counties are in the same state they have a smaller distance between their drug use vectors (same-state indicator coefficient = -1.95, standard error = 0.22,  $p < 10^{-18}$ ). These results point to a meaningful correspondence between drug deviance characteristics of a county and other known characteristics of counties.

### **Comparing the distance between county deviance vectors for similar drugs**

Next, we evaluate whether a drug's vector of deviances across counties captures meaningful information about that drug. Using the same matrix of drug-county deviance, we obtain a *county deviance vector* for each drug. We compare classification of drugs by Red Book therapeutic class against an unsupervised hierarchical clustering of the drug deviance vectors across counties, using the Rand index. Rand index compares a "true" classification to a learned classification of items. The score evaluates how well a clustering retains in the same cluster each pair of items belonging to the same class. There are 153 therapeutic classes, and some of these are highly overlapping: that is, many drugs fall into both classes. We collapse these 153 classes into 75 classes with minimal overlap. Only 46 of our 598 drugs are in more than one collapsed class. Rand index is not quite ideal for our purpose for two reasons: it is designed to evaluate recovery of non-overlapping classes, and it is not traditionally used for such a large number of classes.

To approximate the Rand index, we create 100 versions of the therapeutic class assignments, where we randomly assign each of these drugs to only one of the therapeutic classes it belongs to. We evaluate the distribution of Rand index values across these versions of the true class assignments (Supplementary Fig. 1). Traditionally, a Rand index of 1 indicates good recovery of true classes, but this is not realistic with so many classes, and in addition our purpose is not to classify drugs but to evaluate the signal in our drug deviance vectors. In order to evaluate whether the resulting Rand index values represent a significant co-clustering of drugs in the same

class, we compare the scores to randomly permuted class assignments, over 1000 permutations. We find a strong separation between the Rand index between the true and random class assignments (Supplementary Fig. 1).

### **Analysis of variation in opioids prescription**

We compare the state level drug deviance for opioids to the findings of Curtis, et al: they found that AK, AZ, DE, MD, MA, NH, SC, TN had the highest rates of schedule II oxycodone uses, and CA, TX, IL, MI, NY had lower use of these drugs. We performed a rank-sum test for each group of states to assess whether our results agree with theirs. We find that the low-use states show significantly lower deviance values (Rank-sum test,  $p = 0.002$ ) and the high-prescription states have higher deviance values ( $p = 0.008$ ) (Supplementary Fig. 2d).

### **Regularized regression analyses**

To predict the thyroid drugs, using all other drugs, we fit an elastic net regression model using the python sklearn package<sup>37</sup>. We use z-scored values of all other drugs as predictors so we can directly compare the regression coefficients. The regularization shrinks most of the regression coefficients to zero, and for each of the three regressions, the remaining thyroid drugs are the most predictive drugs.

We take a similar approach to examine the consistency between drug prescription and fraction of deaths in a county due to each cause of death. We again use elastic net regression, with cause of death per county as the outcome, and all drug-county deviance values as candidate predictors. Again, we obtain resulting regression coefficients that can be compared across drugs. Next we assess whether drugs that treat a cause of death are particularly predictive of that cause. We curate sets of drugs for chronic care that are obviously related to causes of death (Supplementary Table 1). For example, although there are drugs to treat flu and pneumonia, this set of drugs is not generally for chronic care and is not as specific to these conditions as, for example, antihypertensive or antidiabetic drugs. Again, most regression coefficients are shrunk to a narrow distribution around zero. For each drug set, we assess if the coefficients in the set are significantly high or low using a two-tailed rank-sum test (Supplementary Table 1, Supplementary Fig. 3). For each cause of death with an obviously related set of drugs, we find that the related drug set has the most positive set of coefficients.

To predict use of thyroid drugs as a function of demographic indicators per county, we use sklearn's MultiTaskElasticNet with thyroid hormone deviance as the outcome. We standardize the demographic variables, and we report the variables that depart from zero in Supplementary Figure 7.

### **Dimensionality reduction**

We perform the PCA using singular value decomposition with sklearn<sup>37</sup>, after normalizing the data (centering and variance-standardizing the drugs). We use the resulting eigenvectors to transform the county-drug deviance data into the projected space. Additionally, we perform canonical correlation analysis on the drug-county deviance data and the county demographic data. This approach treats each county as an observation on these two sets of variables. The canonical correlation analysis identifies linear combinations of the variables in the two data sets (drug data and

demographic data) that maximize the cross-covariance between the two sets. Since canonical correlation analysis is not recommended when the sample size is not many times larger than the number of variables, we restrict this to the 197 drugs with more than half a million users across the country, and we use only the fully observed demographic features, filtering highly collinear features. Using the R package CCA<sup>38</sup>, we obtain the canonical correlates, and we test significance using another R package, CCP<sup>39</sup>. The results (Supplementary Table 2) suggest more than a dozen significant canonical correlates.

To assess the stability of the PCA components, we select subsets of the data. We compare the eigenvectors found when using the full matrix of all drugs to the vectors for the submatrix with a therapeutic class of drugs removed. Comparing each of the top dimensions by the dot product of the eigenvectors, we observe how often the dot product is near 1. For the first two dimensions the dot product ranges between .99 and 1 for all of the 153 classes removed. For second two, 147 of 153 drug classes have eigenvector dot products greater than .95. The class of drugs with the highest influence are the analgesic opioids.

## Reproducibility

All code to make the figures and perform statistics cited in the text is available at <https://github.com/RDMelamed/county-drug-variation>.

## References

1. Blair, D. R. *et al.* A nondegenerate code of deleterious variants in mendelian loci contributes to complex disease risk. *Cell* **155**, 70–80 (2013).
2. Hripcsak, G. *et al.* Observational Health Data Sciences and Informatics (OHDSI): opportunities for observational researchers. *Stud. Health Technol. Inform.* **216**, 574 (2015).
3. Hripcsak, G. *et al.* Characterizing treatment pathways at scale using the OHDSI network. *Proc. Natl. Acad. Sci.* **113**, 7329–7336 (2016).
4. Suling, M. & Pigeot, I. Signal detection and monitoring based on longitudinal healthcare data. *Pharmaceutics* **4**, 607–640 (2012).
5. McDonald, D. C., Carlson, K. & Izrael, D. Geographic Variation in Opioid Prescribing in the U.S. *J. Pain* **13**, 988–996 (2012).
6. Curtis, L. H. *et al.* Geographic Variation in the Prescription of Schedule II Opioid Analgesics among Outpatients in the United States. *Health Serv. Res.* **41**, 837–855 (2006).

7. Brady, J. E. *et al.* Prescription drug monitoring and dispensing of prescription opioids. *Public Health Rep.* **129**, 139–147 (2014).
8. Haegerich, T. M., Paulozzi, L. J., Manns, B. J. & Jones, C. M. What we know, and don't know, about the impact of state policy and systems-level interventions on prescription drug overdose. *Drug Alcohol Depend.* **145**, 34–47 (2014).
9. Simoni-Wastila, L. & Qian, J. Influence of prescription monitoring programs on analgesic utilization by an insured retiree population. *Pharmacoepidemiol. Drug Saf.* **21**, 1261–1268 (2012).
10. Centers for Disease Control and Prevention, National Center for Health Statistics. Underlying Cause of Death 1999-2015 on CDC WONDER Online Database. *Underlying Cause of Death 1999-2015 on CDC WONDER Online Database* (2016). Available at: <http://wonder.cdc.gov/ucd-icd10.html>. (Accessed: 13th March 2017)
11. The George Washington University School of Public Health and Health Services. Impacts of Pharmaceutical Marketing on Healthcare Services in the District of Columbia. (2009).
12. Marketing and Advertising of Pharmaceuticals. Available at: <http://www.ncsl.org/research/health/marketing-and-advertising-of-pharmaceuticals.aspx>. (Accessed: 17th March 2017)
13. Chimonas, S., Rozario, N. M. & Rothman, D. J. Show Us the Money: Lessons in Transparency from State Pharmaceutical Marketing Disclosure Laws. *Health Serv. Res.* **45**, 98–114 (2010).
14. Chubb, S. a. P., Davis, W. A. & Davis, T. M. E. Interactions among Thyroid Function, Insulin Sensitivity, and Serum Lipid Concentrations: The Fremantle Diabetes Study. *J. Clin. Endocrinol. Metab.* **90**, 5317–5320 (2005).



15. Perros, P., McCrimmon, R. J., Shaw, G. & Frier, B. M. Frequency of thyroid dysfunction in diabetic patients: value of annual screening. *Diabet. Med. J. Br. Diabet. Assoc.* **12**, 622–627 (1995).
16. Han, C. *et al.* Subclinical Hypothyroidism and Type 2 Diabetes: A Systematic Review and Meta-Analysis. *PLoS ONE* **10**, (2015).
17. Biondi, B. Thyroid and Obesity: An Intriguing Relationship. *J. Clin. Endocrinol. Metab.* **95**, 3614–3617 (2010).
18. Zhang, Y., Baicker, K. & Newhouse, J. P. Geographic Variation in Medicare Drug Spending. *N. Engl. J. Med.* **363**, 405–409 (2010).
19. McDonagh, M. S., Carson, S. & Thakurta, S. *Drug Class Review: Proton Pump Inhibitors: Final Report Update 5.* (Oregon Health & Science University, 2009).
20. The ALLHAT Officers and Coordinators for the ALLHAT Collaborative Research Group. Major Outcomes in High-Risk Hypertensive Patients Randomized to Angiotensin-Converting Enzyme Inhibitor or Calcium Channel Blocker vs Diuretic: The Antihypertensive and Lipid-Lowering Treatment to Prevent Heart Attack Trial (ALLHAT). *JAMA* **288**, 2981–2997 (2002).
21. Jones, D. W. & Hall, J. E. Seventh Report of the Joint National Committee on Prevention, Detection, Evaluation, and Treatment of High Blood Pressure and Evidence From New Hypertension Trials. *Hypertension* **43**, 1–3 (2004).
22. Psaty, B. M. *et al.* Health Outcomes Associated With Various Antihypertensive Therapies Used as First-Line Agents: A Network Meta-analysis. *JAMA* **289**, 2534–2544 (2003).

23. Ma, J., Lee, K.-V. & Stafford, R. S. Changes in Antihypertensive Prescribing During US Outpatient Visits for Uncomplicated Hypertension Between 1993 and 2004. *Hypertension* **48**, 846–852 (2006).
24. Fischer, M. A. & Avorn, J. Economic Implications of Evidence-Based Prescribing for Hypertension: Can Better Care Cost Less? *JAMA* **291**, 1850–1856 (2004).
25. Wang, H., Schumacher, A. E., Levitz, C. E., Mokdad, A. H. & Murray, C. J. Left behind: widening disparities for males and females in US county life expectancy, 1985–2010. *Popul. Health Metr.* **11**, 8 (2013).
26. Dwyer-Lindgren, L. *et al.* Inequalities in Life Expectancy Among US Counties, 1980 to 2014: Temporal Trends and Key Drivers. *JAMA Intern. Med.* (2017).  
doi:10.1001/jamainternmed.2017.0918
27. Dwyer-Lindgren, L. *et al.* Prevalence of physical activity and obesity in US counties, 2001–2011: a road map for action. *Popul. Health Metr.* **11**, 7 (2013).
28. Chetty, R. *et al.* The Association Between Income and Life Expectancy in the United States, 2001–2014. *JAMA* **315**, 1750–1766 (2016).
29. Murray, C. J. L. *et al.* Eight Americas: Investigating Mortality Disparities across Races, Counties, and Race-Counties in the United States. *PLOS Med.* **3**, e260 (2006).
30. Dieleman, J. L. *et al.* US Spending on Personal Health Care and Public Health, 1996–2013. *JAMA* **316**, 2627–2646 (2016).
31. Agresti, A. *Categorical Data Analysis.* (2013).
32. Remington, P. L., Catlin, B. B. & Gennuso, K. P. The County Health Rankings: rationale and methods. *Popul. Health Metr.* **13**, (2015).

33. U.S. Census Bureau, 2010 Census. 2010 Census Gazetteer Files. Available at:  
[http://www2.census.gov/geo/docs/maps-data/data/gazetteer/Gaz\\_counties\\_national.zip](http://www2.census.gov/geo/docs/maps-data/data/gazetteer/Gaz_counties_national.zip).
34. U.S. Census Bureau, 2010 Census. Census 2010 Summary File 1, Geographic Header Record G001. Available at:  
[https://factfinder.census.gov/bkmk/table/1.0/en/DEC/10\\_SF1/GCTPH1.ST05](https://factfinder.census.gov/bkmk/table/1.0/en/DEC/10_SF1/GCTPH1.ST05).
35. Centers for Medicare & Medicaid Services. National Average Drug Acquisition Cost (NADAC) weekly reference data from November 2013 to current week.
36. Food and Drug Administration. NDC Database File - Text Version. (2016). Available at:  
<http://www.accessdata.fda.gov/cder/ndctext.zip>.
37. Pedregosa, F. *et al.* Scikit-learn: Machine Learning in Python. *J. Mach. Learn. Res.* **12**, 2825–2830 (2011).
38. González, I. & Déjean, S. *CCA: Canonical correlation analysis*. *R package version 1.2*. (2012).
39. Menzel, U. *CCP: Significance Tests for Canonical Correlation Analysis (CCA)*. *R package version 1.1*. (2012).



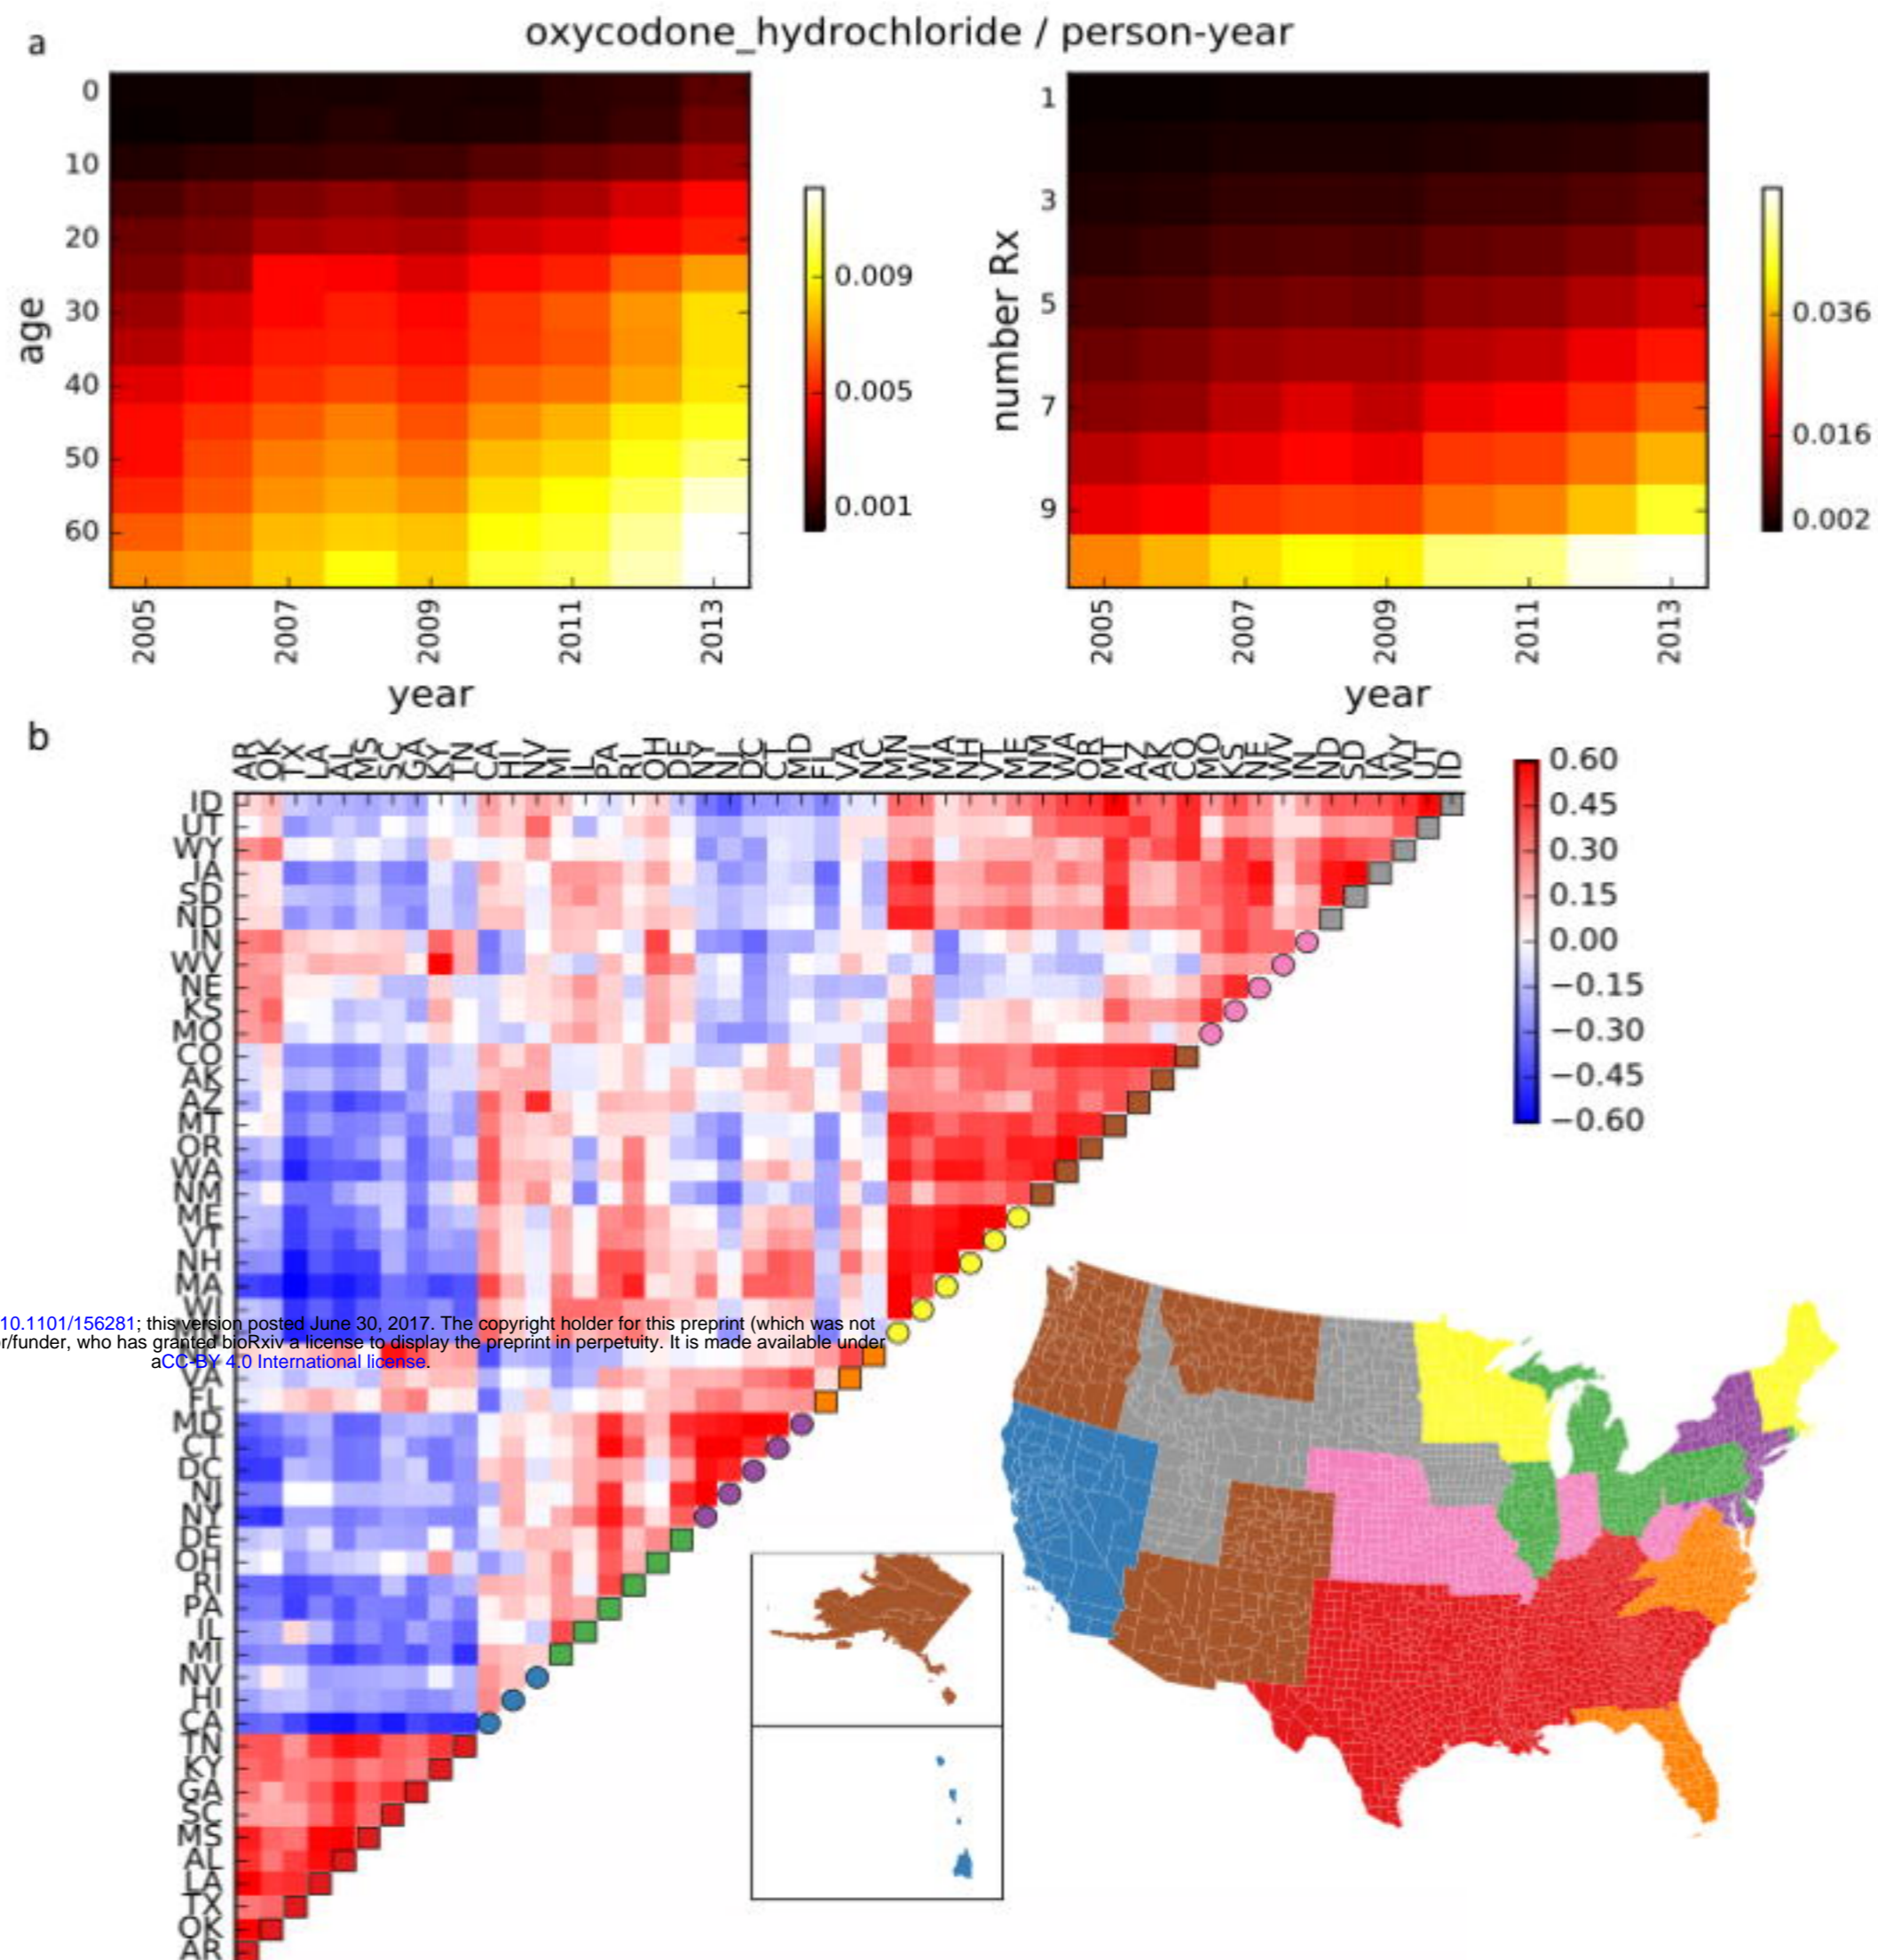

bioRxiv preprint doi: <https://doi.org/10.1101/156281>; this version posted June 30, 2017. The copyright holder for this preprint (which was not certified by peer review) is the author/funder, who has granted bioRxiv a license to display the preprint in perpetuity. It is made available under aCC-BY 4.0 International license.

**Figure 1:** Quantifying variation in drug use, and comparing states by departure from expected drug use. **a.** The probability that a person who *could* be prescribed oxycodone hydrochloride will have a record for this prescription, is shown as a function of year, age, and number of prescriptions in that person-year. This probability increases over years. **b.** We generate drug deviance vectors for each state, which represent how much more or less of each drug is used in the state as compared to the nation-wide model. Clustering states by their spearman correlation in these vectors (see color scale) recovers known similarities between states. We create non-overlapping clusters (legend for each state appears on diagonal) and color the map of the country by drug cluster.



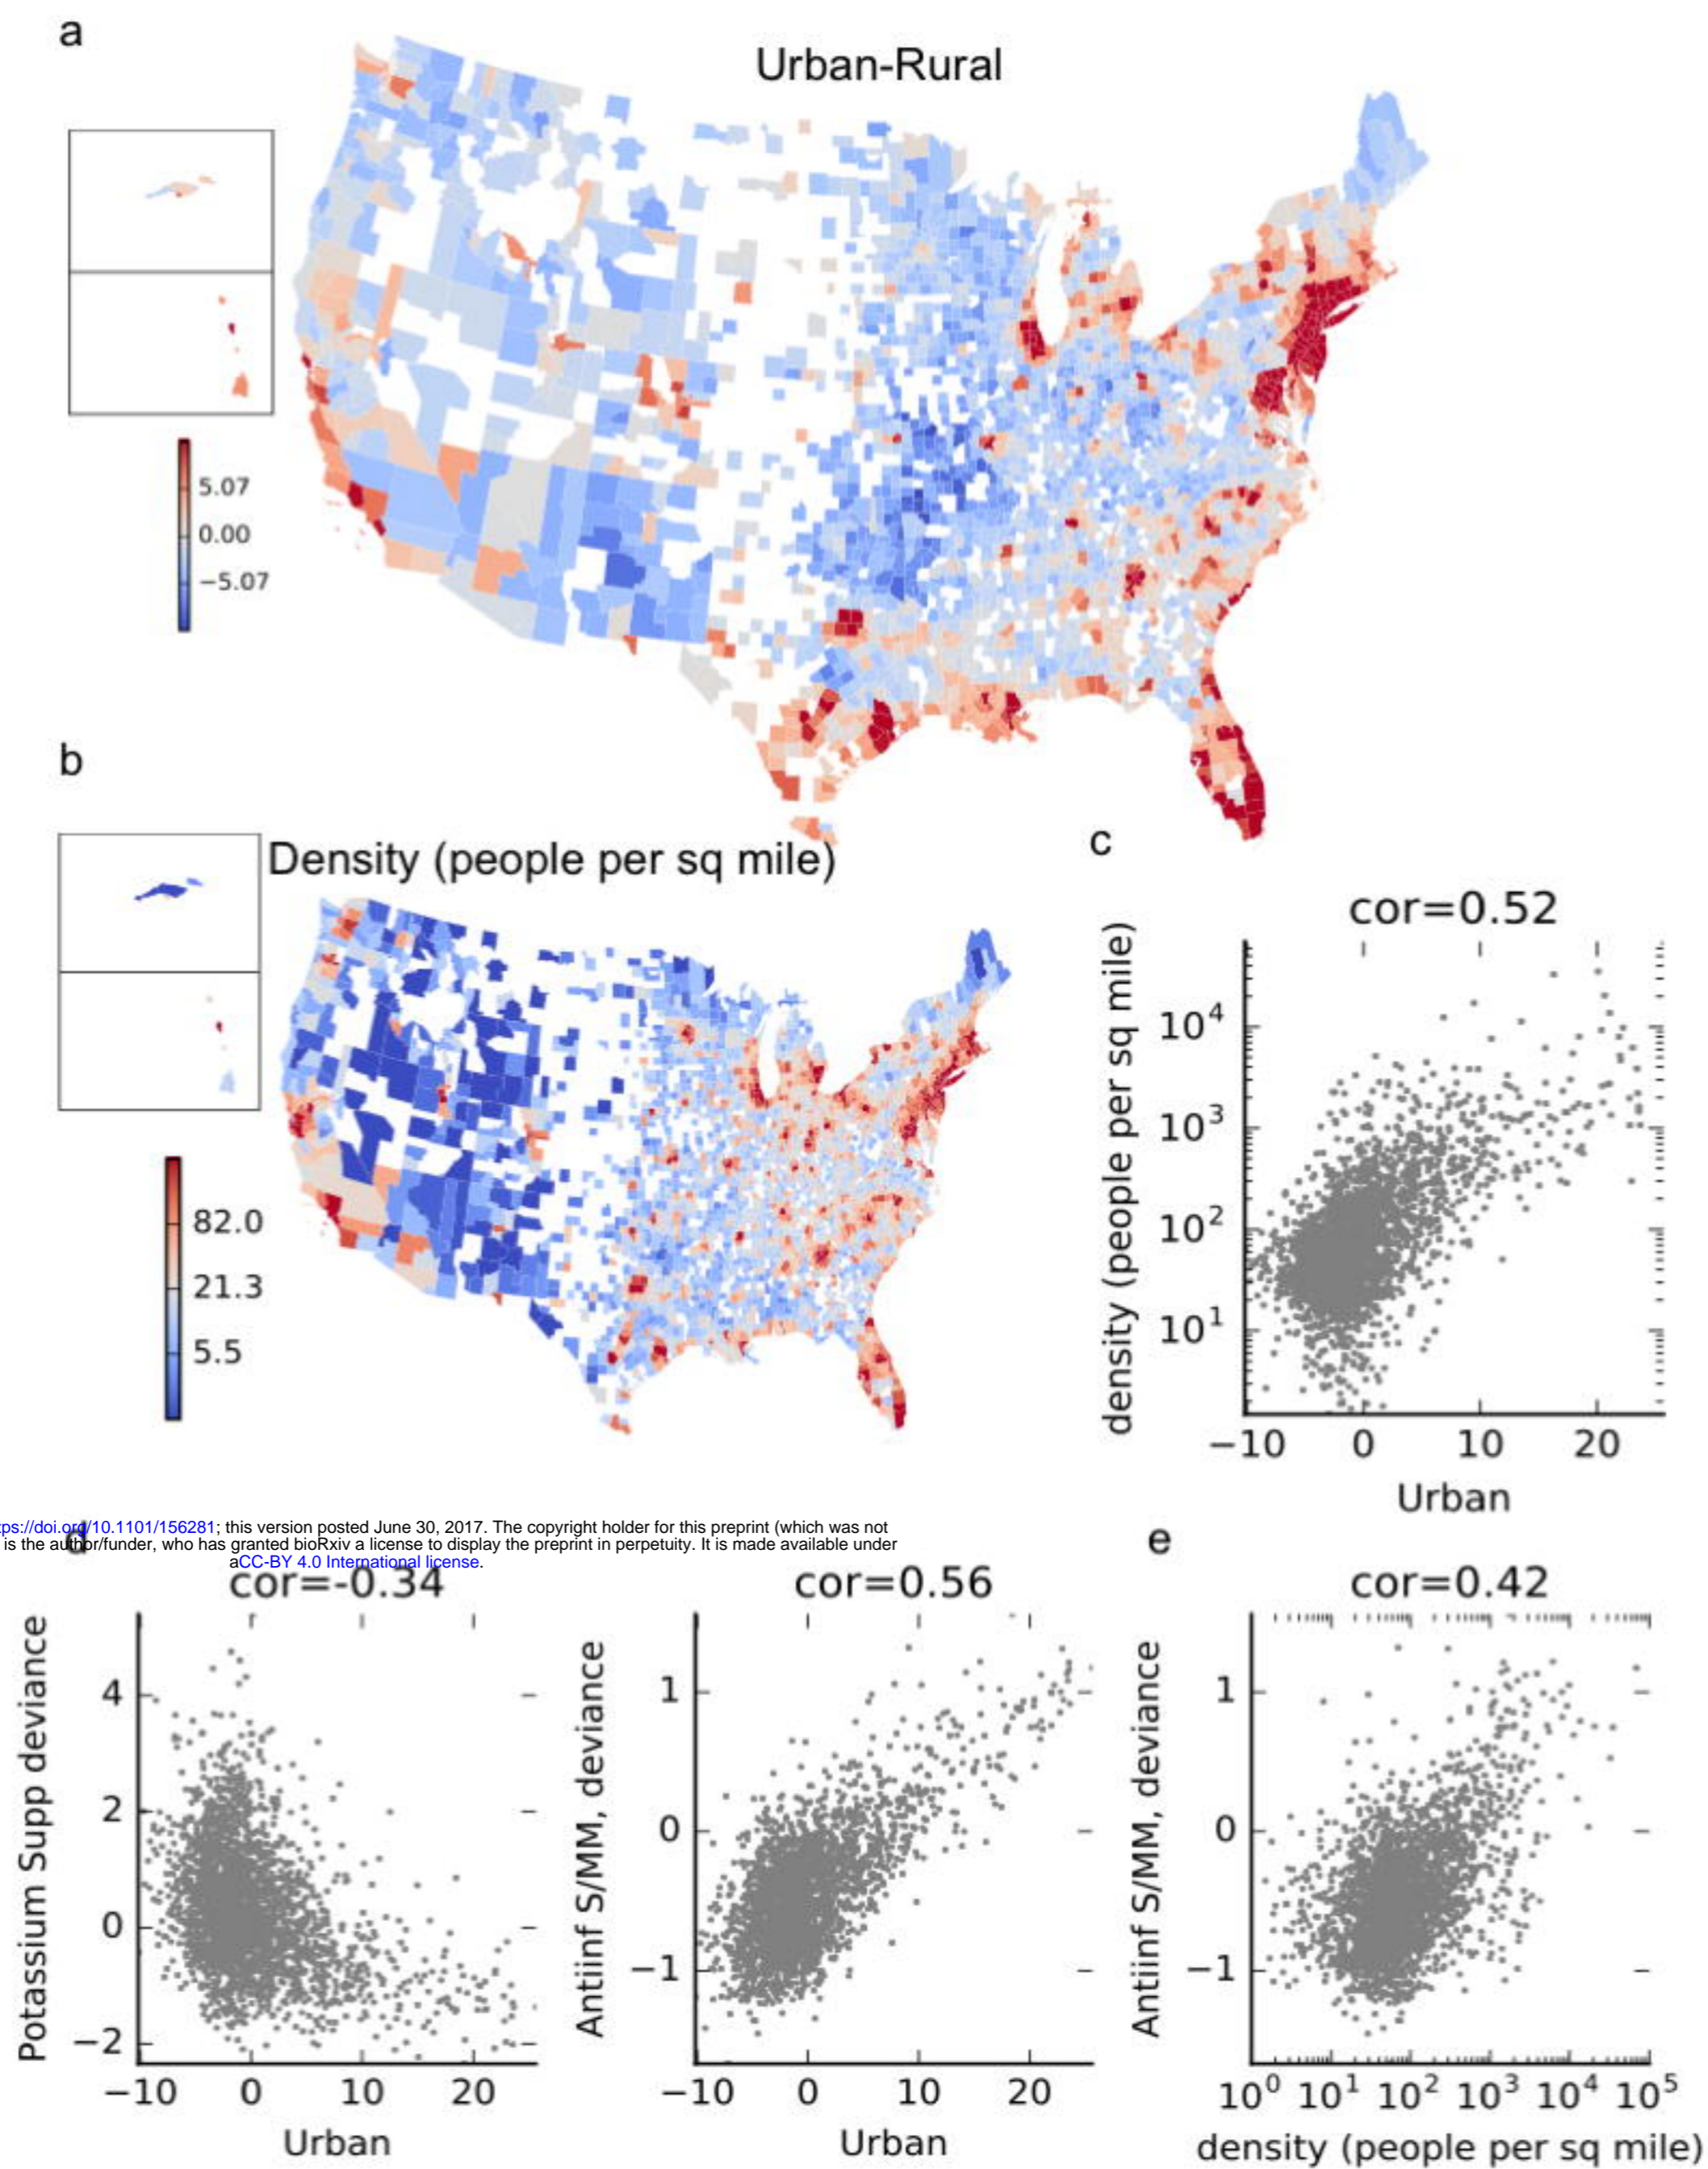

**Figure 2:** Visualizing variance captured by *Urban-Rural* **a.** We project each county's drug deviance vector onto the component, and map the projected values. The high values have a clear correspondence with urban centers in the USA. **b.** Map of US population density per county. Colors are shown in a log scale (see legend). **c.** Each point is a county, and the projected *Urban-Rural* value is compared to the population density in that county, with a Spearman correlation of .52. **d.** Each county's drug deviance value for a class of drugs is compared to the *Urban* projection value. A positive drug deviance represents more drug used in a county than expected. An example of a negatively correlated class is potassium supplements, typically used for people on potassium-depleting thiazide diuretics. The class Antiinf S/MM consists of dermatological topicals for skin inflammations, such as acne. **e.** Directly compares the demographic characteristic from *c* with the drug class from *d*.



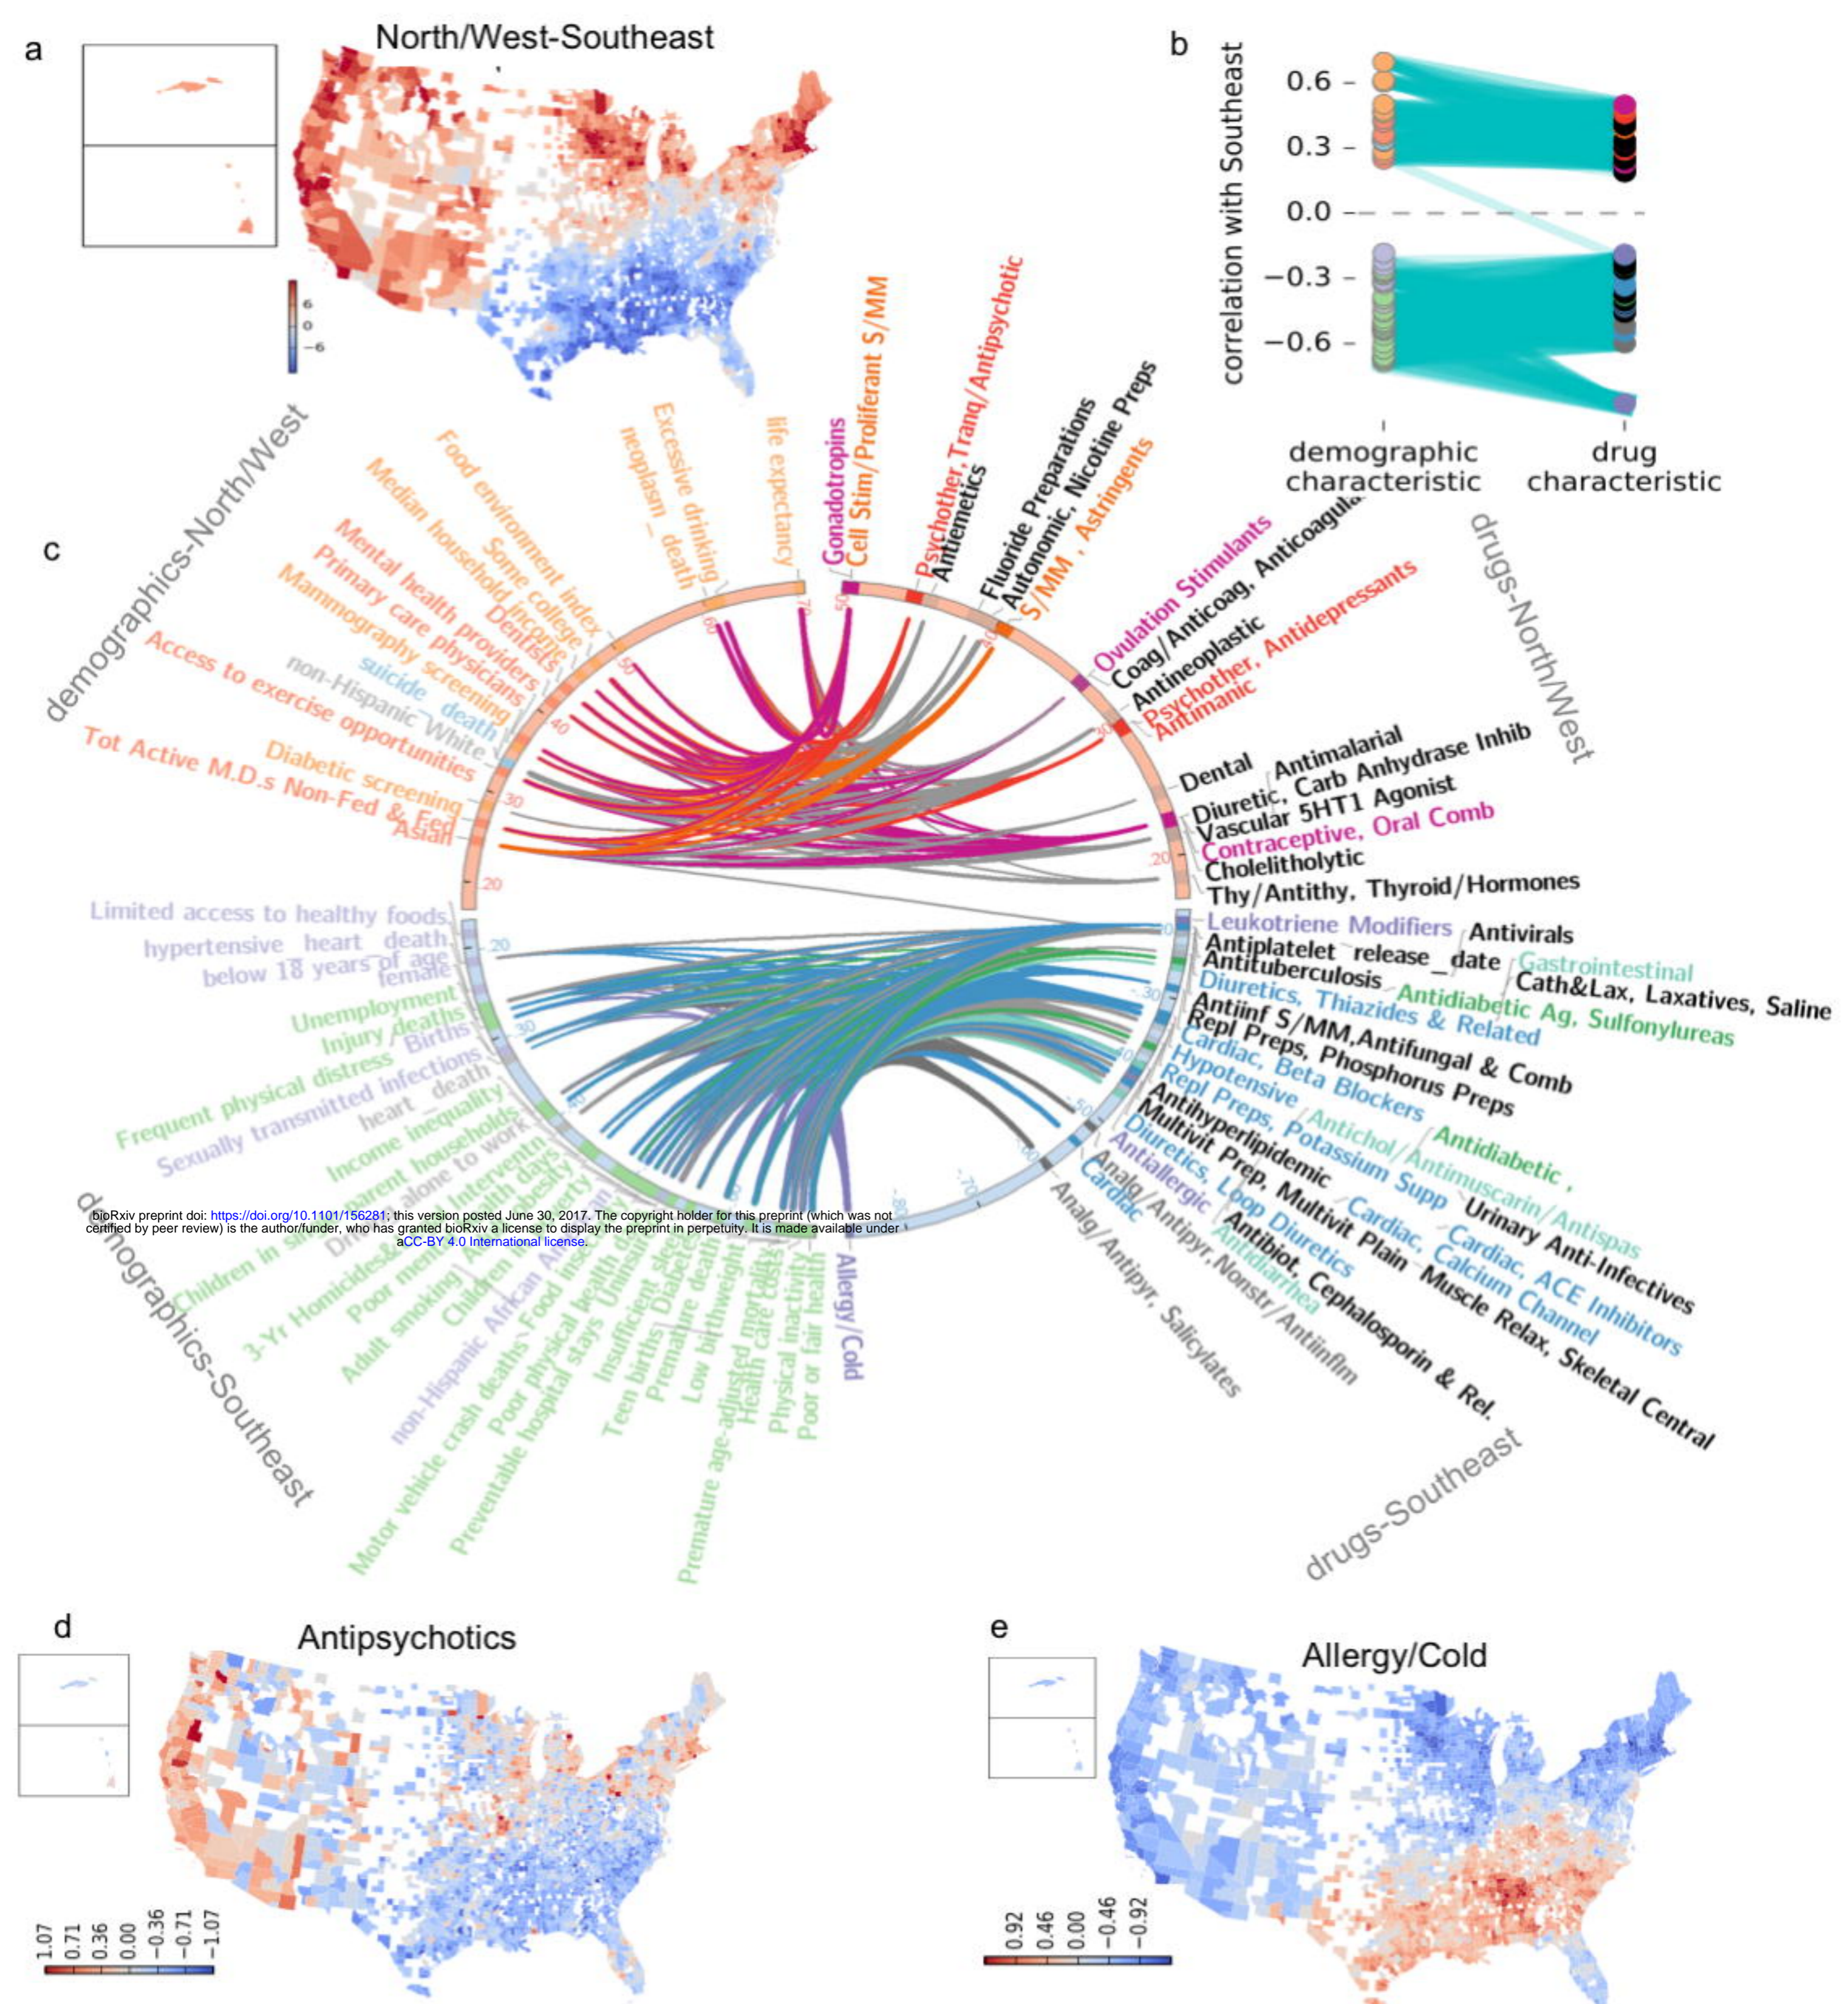

bioRxiv preprint doi: <https://doi.org/10.1101/156281>; this version posted June 30, 2017. The copyright holder for this preprint (which was not certified by peer review) is the author/funder, who has granted bioRxiv a license to display the preprint in perpetuity. It is made available under aCC-BY 4.0 International license.

**Figure 3: Visualization of North/West-Southeast.** **a.** Map of county projected values. **b.** This plot continues the idea of the visualization in Fig. 2 by showing the correlations of county values for the projected dimension, with demographic indicators, and the drug class deviances. On the left side, the correlations between *North/West-Southeast* and demographic factors are shown. Correlated demographic variables that co-cluster in Supplementary Fig. 5 have the same color. On the right side, drug therapeutic classes that correlate positively or negatively are shown. These are colored by related therapeutic uses (see C). Cyan lines connect demographic characteristics that are positively correlated with drug characteristics, with a correlation cutoff of  $>.2$ . **c.** This plots the same bipartite graph as in part **b**, but in circular format to allow each demographic or drug class to be labeled. Thus, the closer a node is to the top or bottom pole, the stronger the positive or negative correlation with *North/West-Southeast*. Edges are colored according to the drug class they connect to. **d.** Use of antipsychotics, showing lower deviance values in the southeastern counties. **e.** Antipsychotics are negatively correlated with allergy and cold medicine.



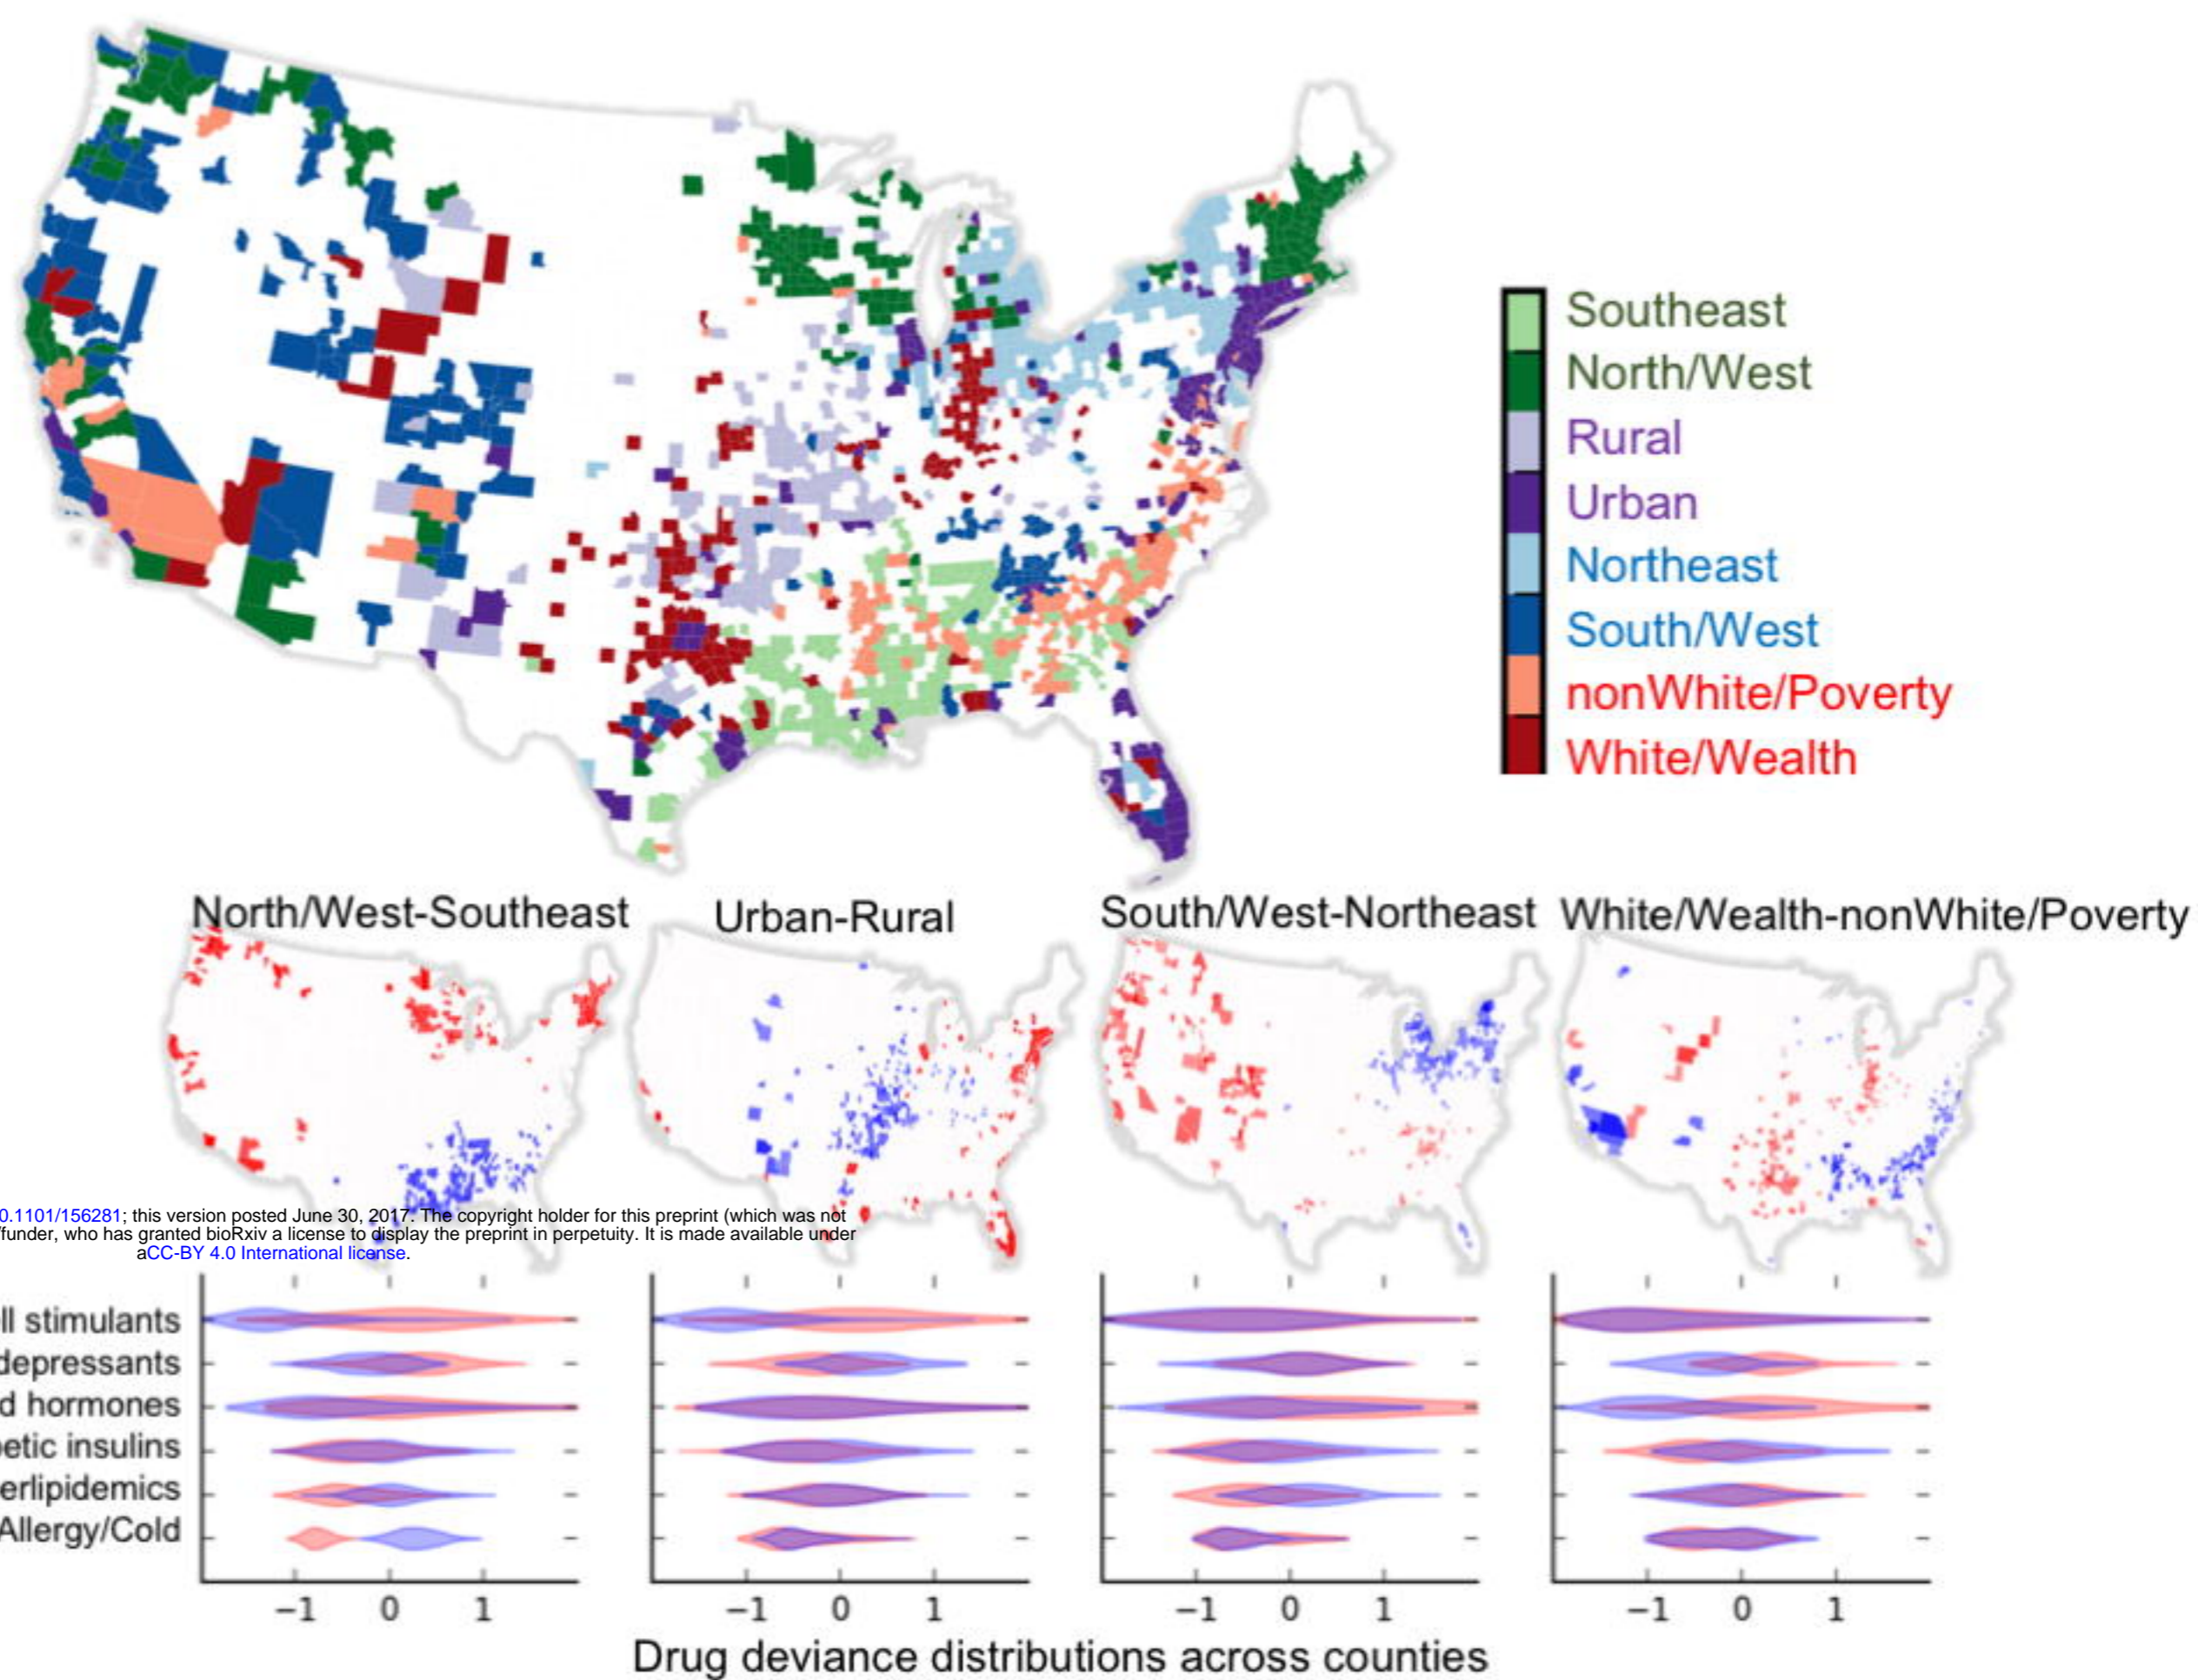

**Figure 4:** Summary of the first four components. Each county is assigned to one of the components if it falls into the top or bottom tenth percentile of a component. The map on top shows these assignments, with one hue per component, and lighter color indicating counties with extreme negative projections, darker for extreme positive. The maps in the middle show the same extreme counties, separated into each component. The bottom panel shows the distribution of deviances for some chosen therapeutic drug classes. The overlapping violin plots depict the use of the drugs in the class for counties in the high (red), and low (blue), extremes of each component.



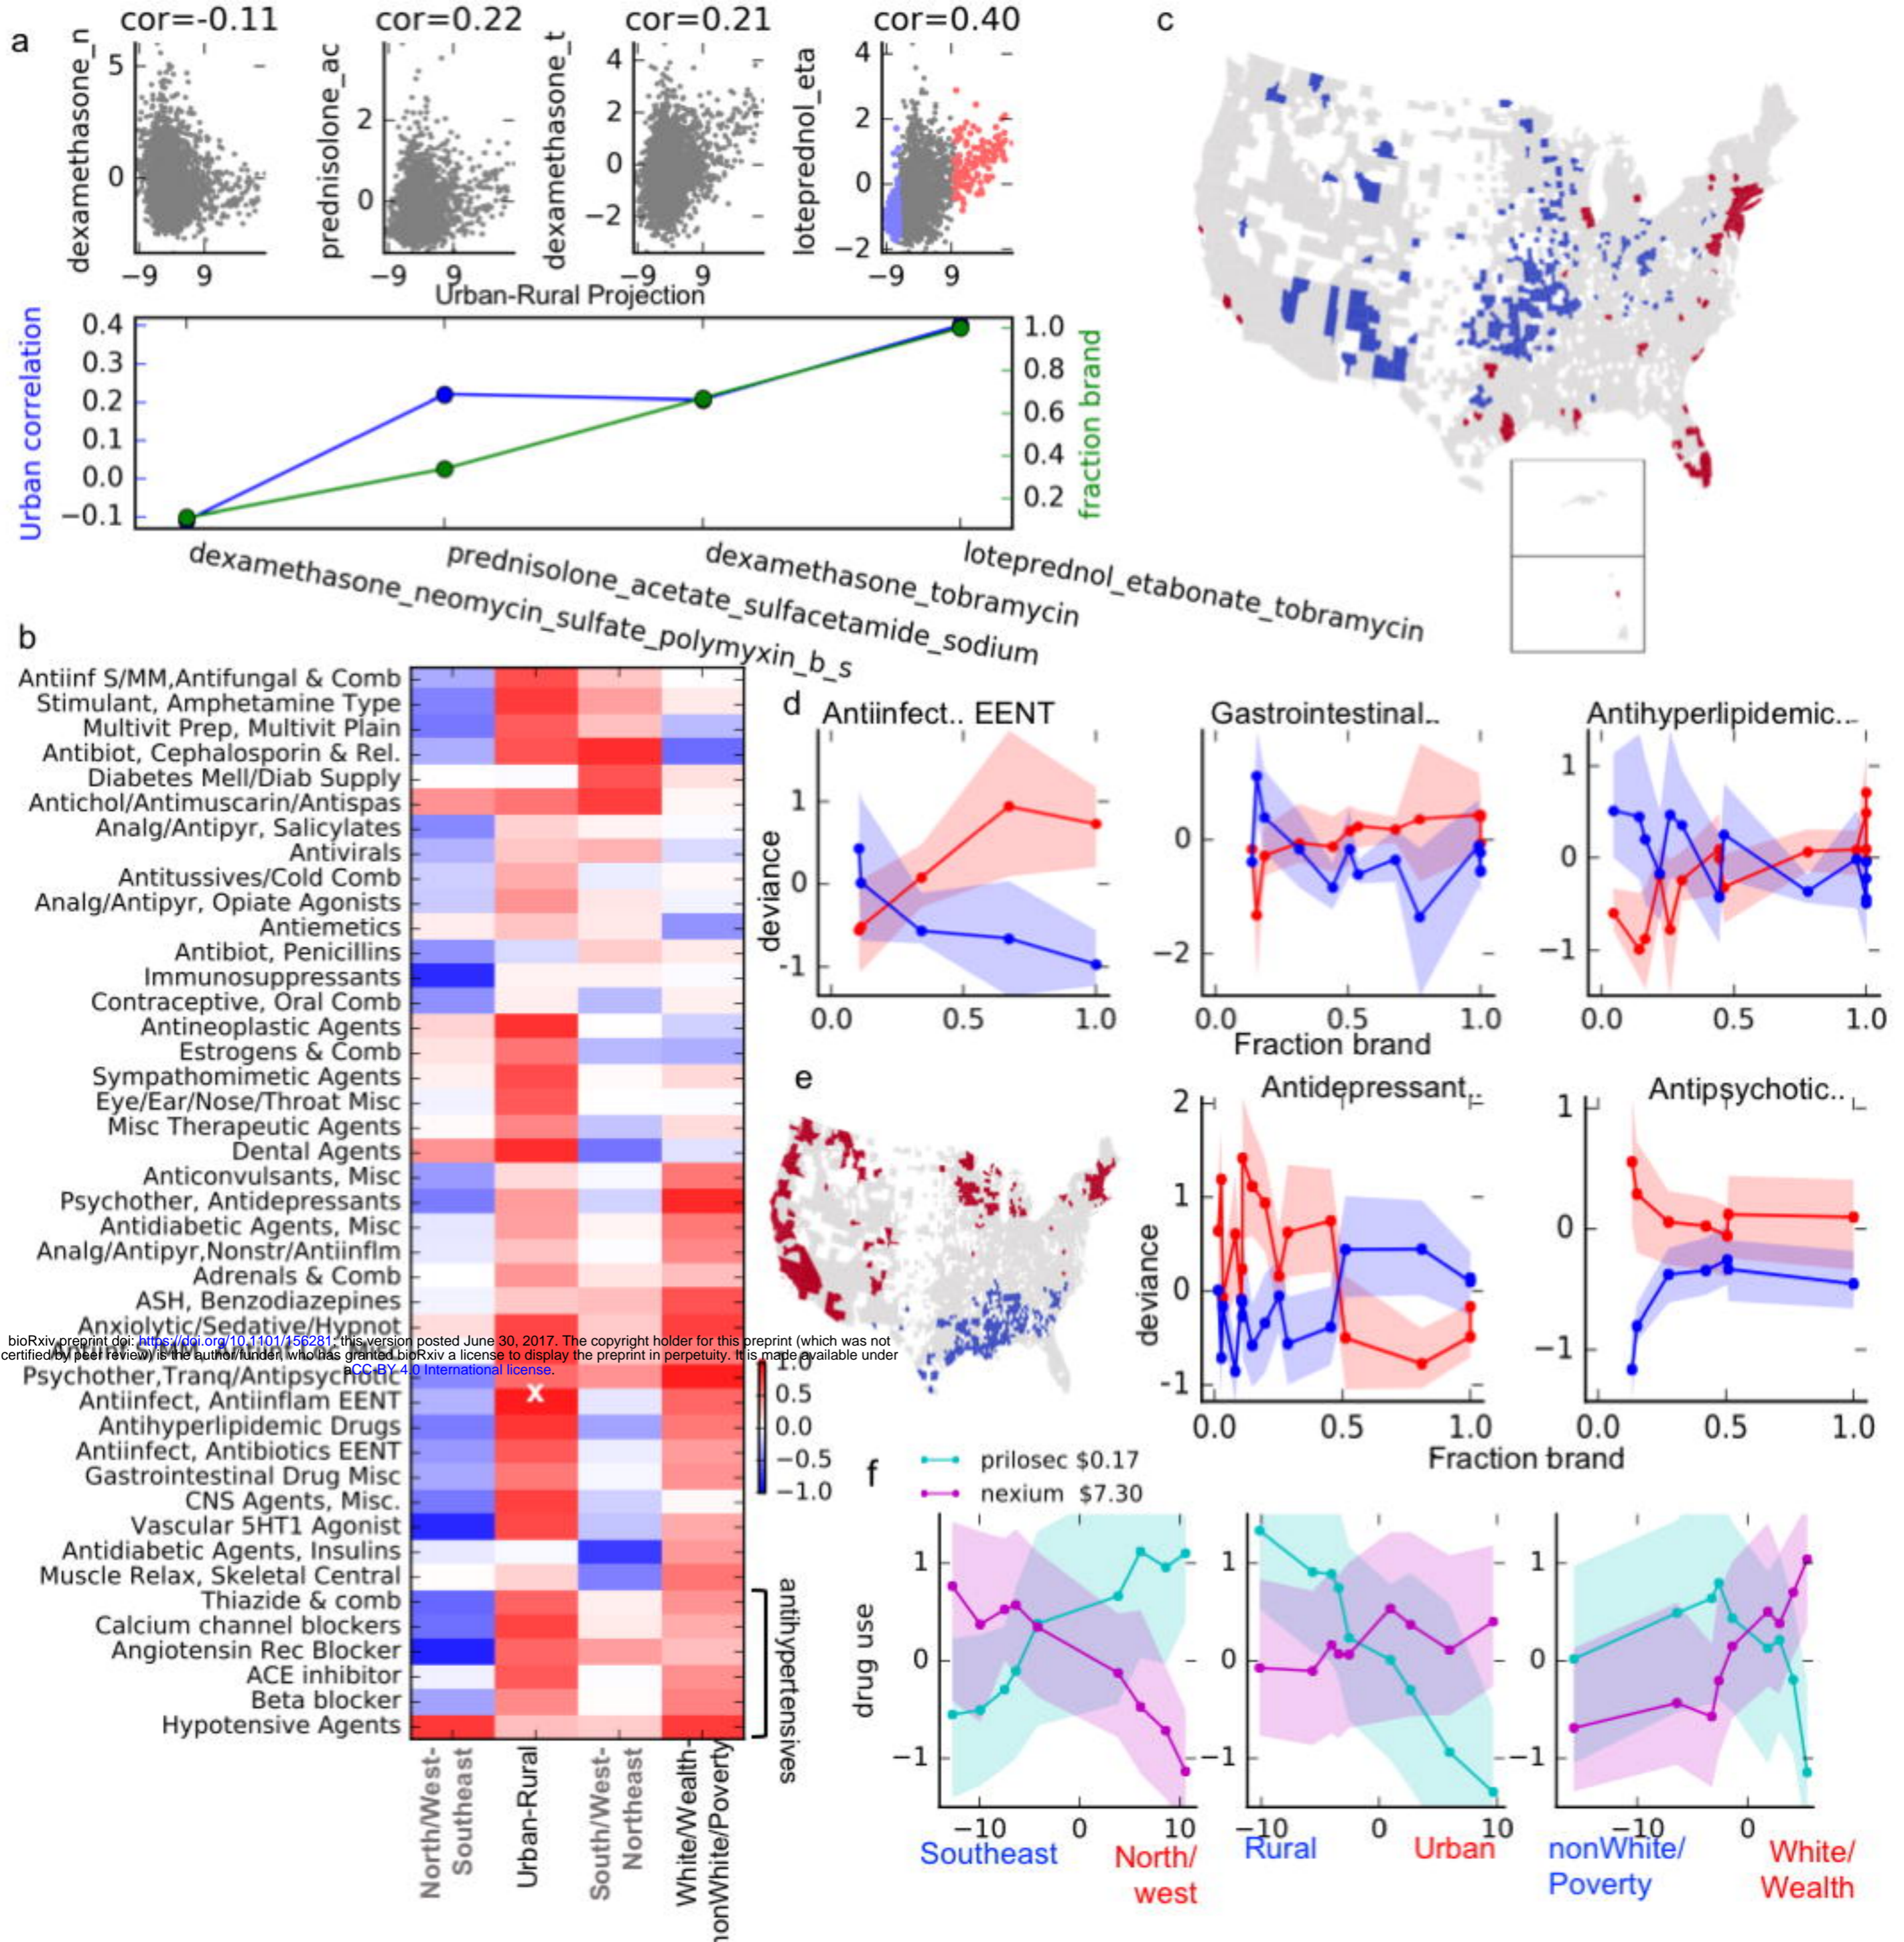

**Figure 5:** Correlation of drug price with regional drug preferences. **a.** In the top panel, antiinflammatory eye drops (part of class *Antiinfect, Antiinflam EENT*), are arranged from left to right by fraction generic. Each scatter plot compares county *Urban-Rural* projection against deviance in the given drug. The correlation increases with fraction generic: shown for the same drugs in the bottom panel. **b.** The correlation between price and drug preference, for the largest therapeutic classes. The example from part a is highlighted with a white X. **c.** *Urban* and *rural* counties, also highlighted in the rightmost plot in a. The two extreme county groups are contrasted in part d. **d.** In each panel the points are drugs in a therapeutic class. The drugs are arranged by increasing fraction brand-only (x-axis). Fraction brand is compared to drug deviance values in the *Urban* (red) and *Rural* (blue) counties (see c). Filled regions highlight the 25 to 75 quartiles for use of each drug across each set of counties. The left plot shows the class from a. **e.** Analogous to c/d but for *North/West-Southeast*, and different drug classes. **f.** Each panel compares use of *Prilosec* and *Nexium* across counties projected onto one component. Counties are binned by the component projection. The x-axis denotes the component projection, and the y-axis shows use of the drugs in those counties. The filled regions show 25 to 75 percentile of the deviance values across counties in the bins.



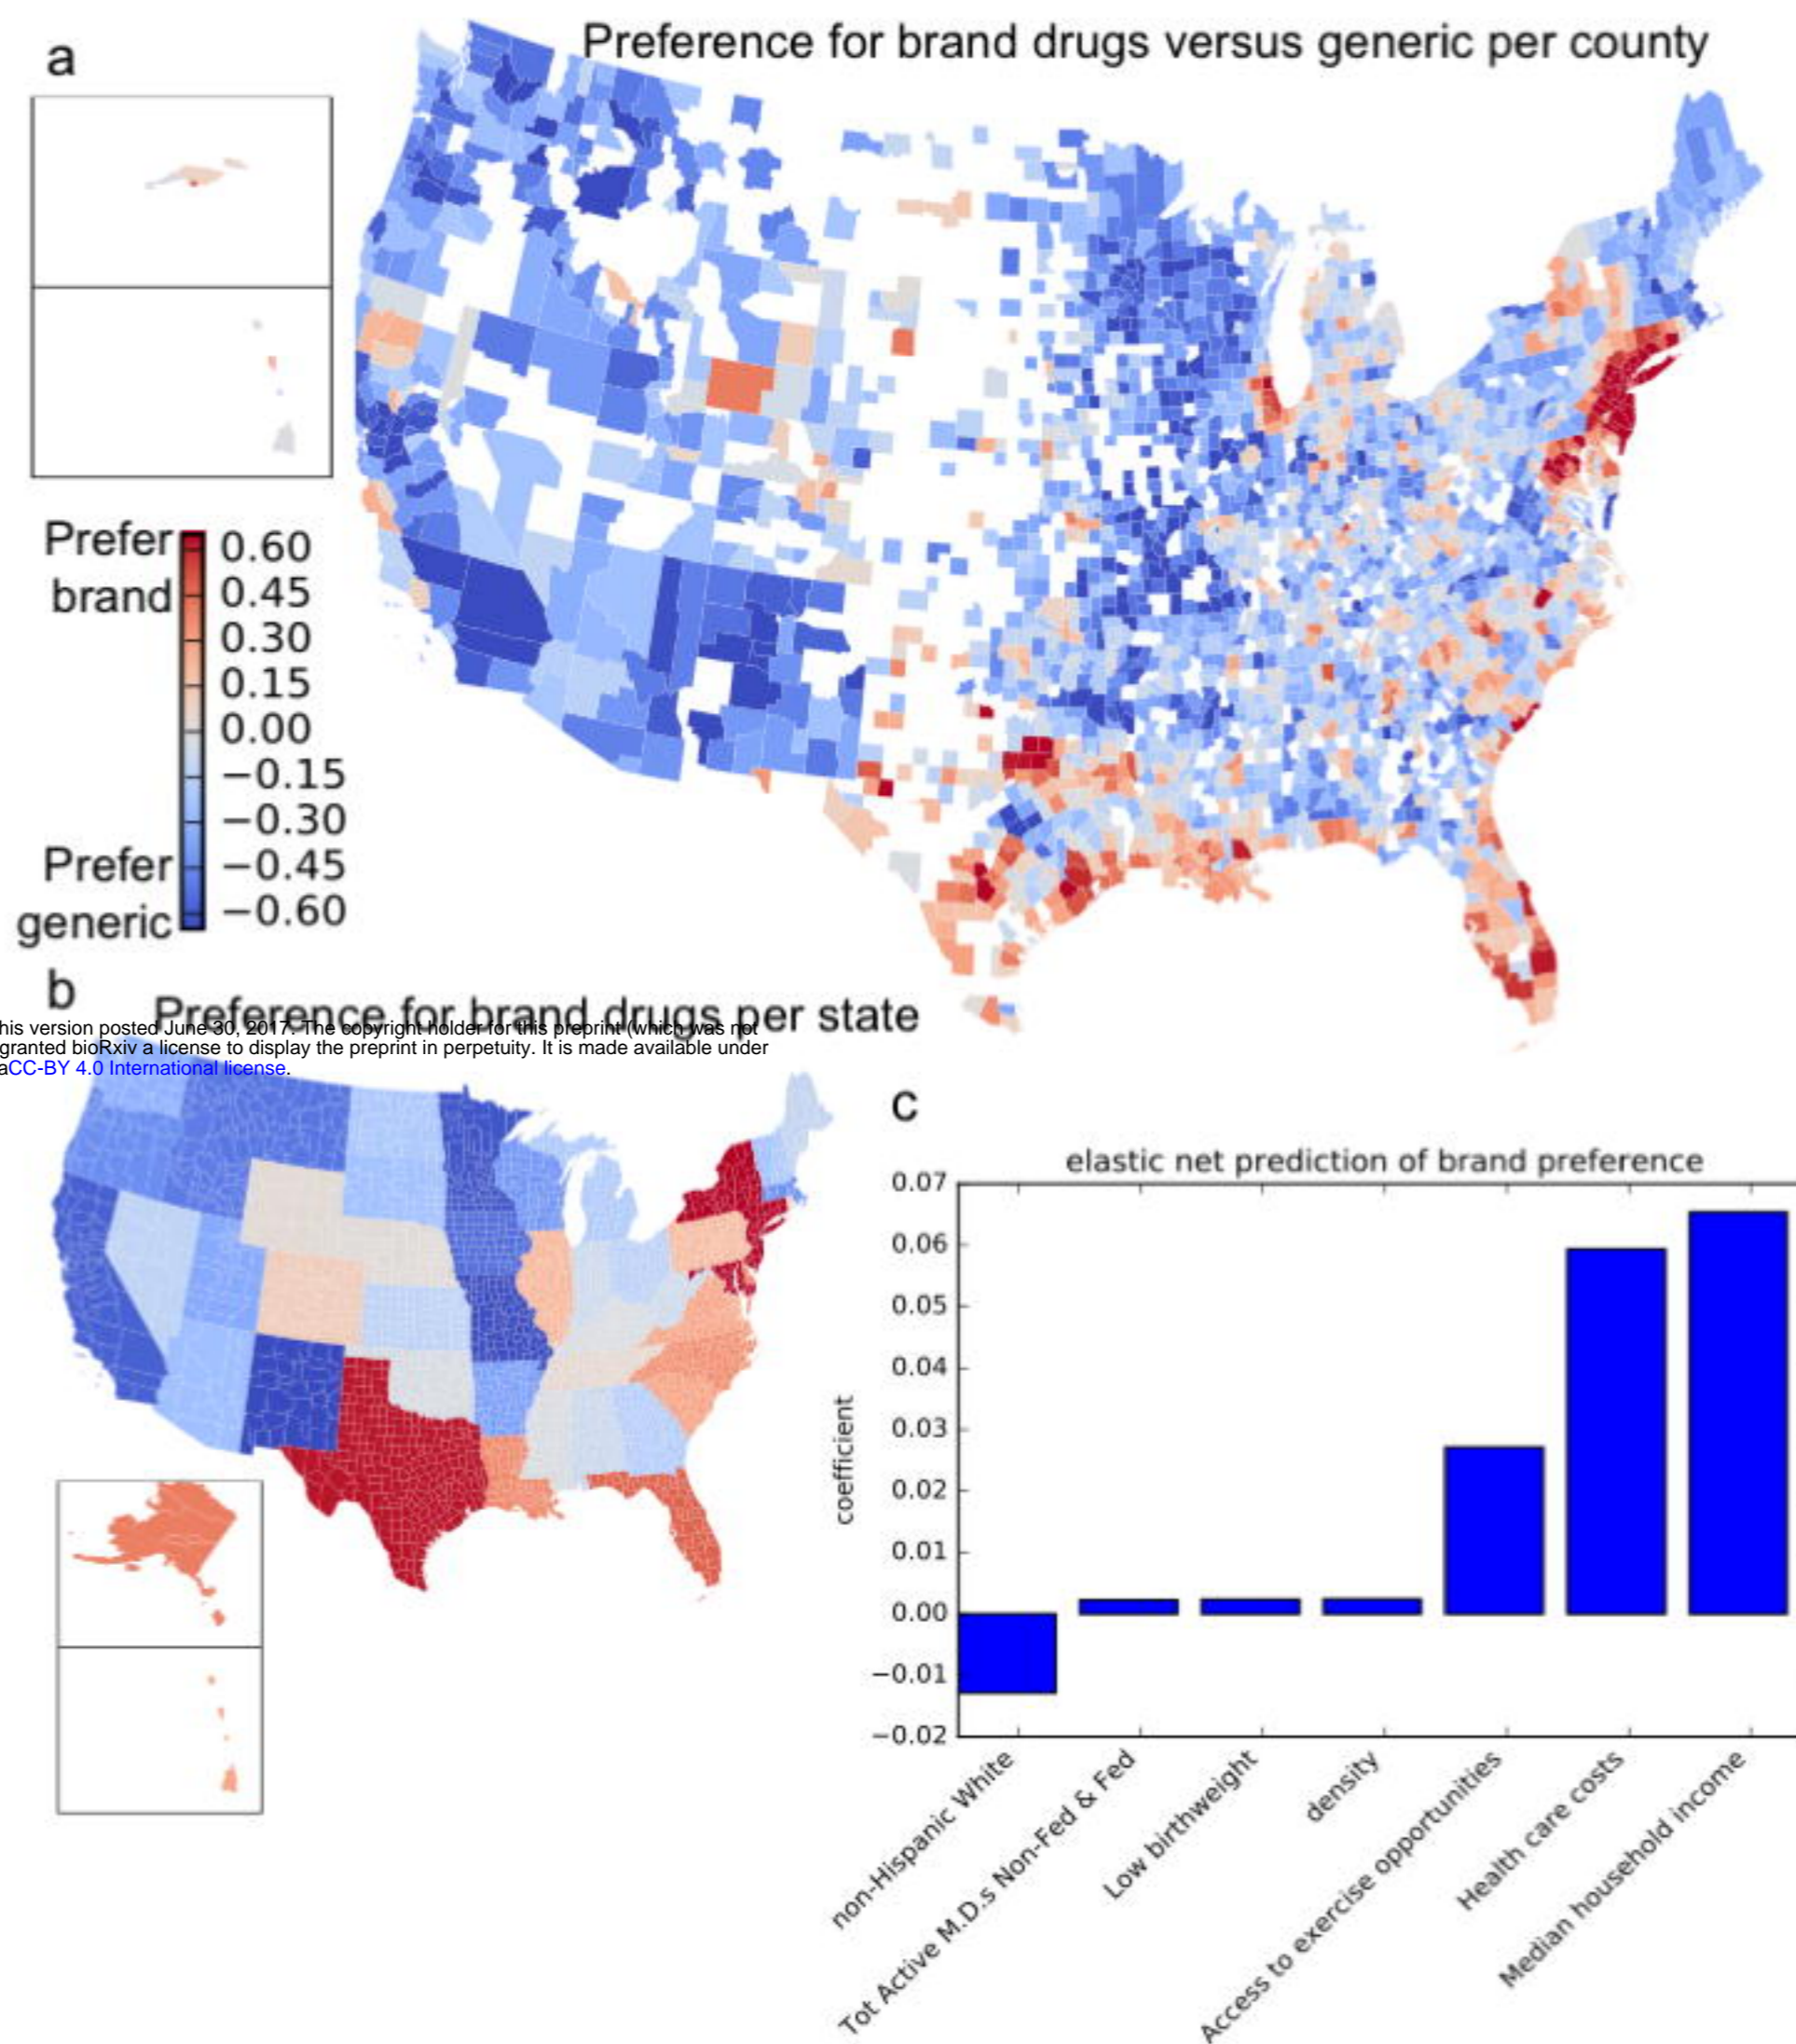

bioRxiv preprint doi: <https://doi.org/10.1101/156281>; this version posted June 30, 2017. The copyright holder for this preprint (which was not certified by peer review) is the author/funder, who has granted bioRxiv a license to display the preprint in perpetuity. It is made available under aCC-BY 4.0 International license.

**Figure 6:** Estimation of brand preference per county and state. **a.** We plot the regression coefficients for brand preference per county. Positive coefficients imply a preference for brand drugs, and against generic drugs. **b.** The same, for states. **c.** Comparison of county brand preference against demographic characteristics, using an elastic net regression model to predict brand preference.
